# Supplementary material for: Improving Agri-environmental Schemes: Suggestions from Farmers and Nature Managers in a Central European Region
Source: Springer Nature journal article supplement (doi:10.1007/s00267-023-01922-w), 2023-12-18
Supplement: MOESM1 [file 26544508]

## Supplementary Information

For manuscript “Improving agri-environmental schemes: Suggestions from farmers and nature managers in a central European region” (Environmental Management)

**Authors:** Manuela Zindler<sup>1</sup>, Maria Haensel<sup>1†</sup>, Ute Fricke<sup>2</sup>, Thomas M. Schmitt<sup>1</sup>, Cynthia Tobisch<sup>3</sup>, Thomas Koellner<sup>1</sup>

<sup>1</sup> University of Bayreuth, Professorship of Ecological Services, Bayreuth Center of Ecology and Environmental Research (BayCEER), Universitätsstraße 30, 95447 Bayreuth, Germany

<sup>2</sup> Department of Animal Ecology and Tropical Biology, Julius-Maximilians-University, Am Hubland, 97074 Würzburg, Germany

<sup>3</sup> Institute of Ecology and Landscape, Weihenstephan-Triesdorf University of Applied Sciences, Am Hofgarten 4, 85354 Freising, Germany.

† Corresponding author:

Maria Haensel, University of Bayreuth, Professorship of Ecological Services, Bayreuth Center of Ecology and Environmental Research (BayCEER), Universitätsstraße 30, 95447 Bayreuth, Germany, [maria.haensel@uni-bayreuth.de](mailto:maria.haensel@uni-bayreuth.de);

Manuela Zindler: <https://orcid.org/0009-0002-1557-9193>

Maria Haensel: <https://orcid.org/0000-0003-4530-8968>

Ute Fricke: <https://orcid.org/0000-0002-5284-4518>

Thomas M. Schmitt: <https://orcid.org/0000-0002-7287-6648>

Cynthia Tobisch: <https://orcid.org/0000-0002-2039-1462>

Thomas Koellner: <https://orcid.org/0000-0001-5022-027X>

### List of Tables (Supplementary Information)

|                                                                                                                                                                                                                                                                |    |
|----------------------------------------------------------------------------------------------------------------------------------------------------------------------------------------------------------------------------------------------------------------|----|
| Table A1. Measures of the Bavarian KULAP since 2015.....                                                                                                                                                                                                       | 3  |
| Table A2. Measures of the VNP since 2015.....                                                                                                                                                                                                                  | 5  |
| Table B1. Institutions contacted during the E-mail survey for the nature managers and additional remarks.....                                                                                                                                                  | 7  |
| Table B2. Counts of respondents working/engaging in the respective organization. ....                                                                                                                                                                          | 8  |
| Table C1. Detailed description of the categories, including subcategories, for the differentiation of new and existing ideas, and the number of suggestions in each category for nature managers (nat), farmer cluster 1 (f1), and farmer cluster 2 (f2). .... | 9  |
| Table D1. Detailed description of all thematic categories. ....                                                                                                                                                                                                | 13 |
| Table D2. Thematic categorization system with frequencies of coded segments.....                                                                                                                                                                               | 27 |
| Table E1. Exemplary coding for the suggestion of example 1.....                                                                                                                                                                                                | 33 |
| Table E2. Exemplary coding for the suggestion of example 2.....                                                                                                                                                                                                | 33 |
| Table F1. Detailed description of selected farmer suggestions .....                                                                                                                                                                                            | 35 |
| Table G1. Suggested adaptations by nature managers for the KULAP and the VNP. ....                                                                                                                                                                             | 37 |
| Table H1. The top five measures regarding the area enrolled and number of applications for the KULAP and the VNP for the year 2020.. ....                                                                                                                      | 38 |
| Table I1. Variables with respective questions from the LandKlif survey used for the cluster analysis of the farmers.....                                                                                                                                       | 39 |
| Table K1. The ten most influencing qualitative variables for each farmer cluster. ....                                                                                                                                                                         | 48 |
| Table K2. Socio-demographic and farm characteristics per each farmer cluster. ....                                                                                                                                                                             | 49 |

### List of Figures (Supplementary Information)

|                                                                                                                                                                                                      |    |
|------------------------------------------------------------------------------------------------------------------------------------------------------------------------------------------------------|----|
| Fig. F1. Relative share of the most dominant codes within (a) policies & design and (b) financial support & support programs as a subcode of policies & design for the group of farmers per cluster. | 35 |
| Fig. J1. Farmer clusters as a result of the hierarchical clustering and the NbClust function. ....                                                                                                   | 44 |
| Fig. J2. Contribution of each variable to dimension one.....                                                                                                                                         | 44 |
| Fig. J3. Contribution of each variable to dimension two (farmers).....                                                                                                                               | 45 |
| Fig. J4. Contribution of the quantitative variables to the first two dimensions. ....                                                                                                                | 45 |
| Fig. J5. Contribution of the qualitative variables to the first two dimensions. ....                                                                                                                 | 46 |
| Fig. J6. (a) Dendrogram computed by the HCPC function. (b) Bar plot with inertia gain computed by the HCPC function, showing the division into the two farmer clusters. ....                         | 46 |
| Fig. J7. Optimal number of clusters according to the NbClust function.. ....                                                                                                                         | 47 |

## A. Measures of the Bavarian KULAP and the VNP since 2015

Table A1. Measures of the Bavarian KULAP since 2015. Rows that are colored in green mark measures that are applied on grassland. Rows that are colored in brown mark measures that are applied on cropland. Rows that are white refer to management practices that can be applied to different types of land. Source: StMELF, 2020b, 2020c.

|                         | Code                        | Measure description                                                                                                     | Target area           | Introduced <sup>1</sup> | Unavail-able <sup>2</sup> |
|-------------------------|-----------------------------|-------------------------------------------------------------------------------------------------------------------------|-----------------------|-------------------------|---------------------------|
| Organic farming         | B10                         | Organic farming                                                                                                         | Entire farm           | 2015                    |                           |
| Climate protection      | B19                         | Extensive grassland use for grazing stock eating roughage; maximum 1.0 LSU                                              | Branch related        | 2020                    |                           |
|                         | B20                         | Extensive grassland use for grazing stock eating roughage; maximum 1.4 LSU                                              | Branch related        | 2015                    | 2016                      |
|                         | B21                         | Extensive grassland use for grazing stock eating roughage; maximum 1.76 LSU                                             | Branch related        | 2015                    | 2016, 2021                |
|                         | B22                         | Extensive grassland use for grazing stock eating roughage in alpine areas; maximum 1.4 LSU                              | Branch related        | 2015                    | 2016                      |
|                         | B23                         | Extensive grassland use for grazing stock eating roughage in alpine areas; maximum 1.76 LSU                             | Branch related        | 2015                    | 2016, 2021                |
|                         | B25                         | Low emission distribution of liquid manure/organic fertilizers using own equipment                                      | Farm business related | 2015                    |                           |
|                         | B26                         | Low emission distribution of liquid manure/organic fertilizers across multiple farm businesses                          | Farm business related | 2015                    |                           |
|                         | B28                         | Conversion of cropland into grassland along water bodies and in other sensitive areas                                   | Single areas          | 2015                    | 2016                      |
|                         | B29                         | Conversion of cropland into grassland along water bodies and in other sensitive areas – bog areas                       | Single areas          | 2015                    |                           |
| Soil & water protection | B30                         | Extensive grassland use along water bodies and in other sensitive areas                                                 | Single areas          | 2015                    | 2016                      |
|                         | B32                         | Riparian strips and erosion protection strips in red areas according to the AVDüV (fertilizer ordinance); 7-30 m width  | Single areas          | 2019                    |                           |
|                         | B33                         | Riparian strips and erosion protection strips in red areas according to the AVDüV (fertilizer ordinance); 13-30 m width | Single areas          | 2019                    |                           |
|                         | B34                         | Riparian strips and erosion protection strips; 6-30 m width                                                             | Single areas          | 2015                    |                           |
|                         | B35                         | Winter soil cover with catch crops (and undersown crops)                                                                | Single areas          | 2015                    | 2016-2019, 2021           |
|                         | B36                         | Winter soil cover with wild plant seeds ( <i>Wildsaaten</i> )                                                           | Single areas          | 2015                    | 2016                      |
|                         | B37                         | Mulch seeding for row crops                                                                                             | Single areas          | 2015                    | 2016, 2021                |
|                         | B38                         | Strip/direct seeding for row crops                                                                                      | Single areas          | 2015                    | 2016                      |
|                         | B39                         | Abandonment of intensive crops in areas sensitive for water resource management                                         | Single areas          | 2021                    |                           |
|                         | B62                         | Abandonment of herbicides in crop cultivation                                                                           | Single areas          | 2021                    |                           |
| B63                     | Use of trichogramma in corn | Branch related                                                                                                          | 2015                  |                         |                           |

|                     |     |                                                                                        |                   |      |            |
|---------------------|-----|----------------------------------------------------------------------------------------|-------------------|------|------------|
| Biodiversity        | B40 | Maintenance of biodiverse grasslands                                                   | Single areas      | 2015 | 2016, 2017 |
|                     | B41 | Extensive grassland use                                                                | Single areas      | 2015 | 2016, 2017 |
|                     | B42 | Establishment of old grass strips                                                      | Single areas      | 2020 |            |
|                     | B43 | Diverse crop rotation with flowering crops                                             | Branch related    | 2020 |            |
|                     | B44 | Diverse crop rotation with protein crops (legumes)                                     | Branch related    | 2015 | 2016, 2017 |
|                     | B45 | Diverse crop rotation with large grain legumes                                         | Branch related    | 2015 | 2016, 2017 |
|                     | B46 | Diverse crop rotation with old crops                                                   | Branch related    | 2015 | 2016, 2017 |
|                     | B47 | Annually changing wildflower areas                                                     | Single areas      | 2015 | 2016       |
|                     | B48 | Wildflower areas along forest margins and in the field                                 | Single areas      | 2015 |            |
|                     | B61 | Wildflower areas along forest margins and in the field (maximum 30% arable land)       | Single areas      | 2020 |            |
| Cultural landscape  | B50 | Hay milk – extensive feed extraction                                                   | Branch related    | 2015 |            |
|                     | B51 | Mowing of steep meadows                                                                | Single areas      | 2015 | 2016       |
|                     | B52 | Continuous management of recognized alps (alpine regions)                              | Single areas      | 2015 | 2016       |
|                     | B55 | Viticulture on steep slopes and terraces                                               | Single areas      | 2015 | 2016       |
|                     | B57 | Orchards                                                                               | Single areas      | 2015 | 2016       |
|                     | B58 | Extensive pond management                                                              | Single areas      | 2015 | 2016       |
|                     | B59 | Provision of area for the permanent establishment of structural and landscape elements | Single areas      | 2016 |            |
| Investment measures | B59 | Establishment of structural and landscape elements                                     | Single investment | 2016 |            |
|                     | B49 | Renewal of hedges and field shrubs                                                     | Single investment | 2016 |            |
|                     | B56 | Establishment of stone walls in viticulture                                            | Single investment | 2016 |            |

<sup>1</sup> Only the measures after the restructuring of the KULAP in 2015 are shown. Measures with the year 2015 might have existed in a similar way before 2015.

<sup>2</sup> Unavailable means that the respective measure was not open for new applications in the indicated year.

Table A2. Measures of the VNP since 2015. Rows that are colored in green mark measures that are applied on grassland. Rows that are colored in brown mark measures that are applied on cropland. Rows that are colored in blue mark measures for ponds. Rows that are white refer to management practices that can be applied to different types of land. Source: StMELF, 2020c, 2020d.

|                                        | Code                          | Measure description                                                                                                                                    |
|----------------------------------------|-------------------------------|--------------------------------------------------------------------------------------------------------------------------------------------------------|
| Biotope type arable fields             | H11                           | Extensive cropland use for field breeding birds and arable wild herbs                                                                                  |
|                                        | H12                           | Set-aside of arable field with soil cover development on its own for species protection reasons; yield index < 2.500                                   |
|                                        | H13                           | Set-aside of arable field with soil cover development on its own for species protection reasons; yield index > 2.501 and < 3.500                       |
|                                        | H14                           | Set-aside of arable field with soil cover development on its own for species protection reasons; yield index > 3.501                                   |
|                                        | H15                           | Set-aside with stubble (as single measure; compare W05)                                                                                                |
| Biotope type meadows                   | H20                           | Conversion of cropland into grassland                                                                                                                  |
|                                        | H21                           | Extensive mowing of valuable habitats (from a nature conservation perspective); cutting date 01.06.                                                    |
|                                        | H22/F22                       | Extensive mowing of valuable habitats (from a nature conservation perspective); cutting date 15.06.                                                    |
|                                        | H23/F23                       | Extensive mowing of valuable habitats (from a nature conservation perspective); cutting date 01.07.                                                    |
|                                        | H24/F24                       | Extensive mowing of valuable habitats (from a nature conservation perspective); cutting date 01.08.                                                    |
|                                        | H25/F25                       | Extensive mowing of valuable habitats (from a nature conservation perspective); cutting date 01.09.                                                    |
|                                        | H26/F26                       | Extensive mowing of valuable habitats (from a nature conservation perspective); cutting until 14.06., management stop between 15.06. and 31.08.        |
|                                        | H27                           | Abandonment of any kind of fertilizers and chemical pesticides (as single measure; compare N21)                                                        |
|                                        | H28                           | Preservation of orchards (single fruit trees) (as single measure; compare W07)                                                                         |
|                                        | H29                           | Set-aside of meadows for species protection reasons                                                                                                    |
| H30                                    | Result-oriented grassland use |                                                                                                                                                        |
| Biotope type pastures                  | H31/F31                       | Extensive grazing of valuable habitats (from a nature conservation perspective); grazing of sheep, cattle incl. water buffalo, or horses incl. donkeys |
|                                        | H32/F32                       | Extensive grazing of valuable habitats (from a nature conservation perspective); grazing of cattle on alps (alpine areas)                              |
|                                        | H33/F33                       | Extensive grazing of valuable habitats (from a nature conservation perspective); grazing of goats                                                      |
| Biotope type ponds                     | H41                           | Support for ecologically valuable ponds with silting zone ( <i>Verlandungszone</i> ); alternative 1: < 25% silting zone                                |
|                                        | H42                           | Support for ecologically valuable ponds with silting zone; alternative 1: > 25% silting zone                                                           |
|                                        | H43                           | Support for ecologically valuable ponds with silting zone; alternative 2: < 25% silting zone                                                           |
|                                        | H44                           | Support for ecologically valuable ponds with silting zone; alternative 2: > 25% silting zone                                                           |
|                                        | H45                           | Complete non utilization of ponds                                                                                                                      |
| Additional services (for VNP measures) | N11                           | Abandonment of any kind of fertilizers                                                                                                                 |
|                                        | N12                           | Abandonment of mineral fertilizers and organic fertilizers (except solid dung)                                                                         |
|                                        | N21                           | Abandonment of any kind of fertilizers and chemical pesticides                                                                                         |
|                                        | N22                           | Abandonment of mineral fertilizers, organic fertilizers (except solid dung) and chemical pesticides                                                    |
|                                        | W01                           | Reduced seed density                                                                                                                                   |
|                                        | W02                           | Long commute (minimum 5 km one-way)                                                                                                                    |
|                                        | W03                           | Management unit (=field size) maximum 0.5 ha                                                                                                           |
|                                        | W04                           | Management unit (=field size) maximum 0.3 ha                                                                                                           |

|     |                                                                                                 |
|-----|-------------------------------------------------------------------------------------------------|
| W05 | Set-aside with stubble                                                                          |
| W06 | Annual management procedure for soil cultivation between 01.09. and 31.10.                      |
| W07 | Preservation of orchards (single fruit trees)                                                   |
| W08 | Use of mowing device with cutter bars                                                           |
| W09 | Use of special machines                                                                         |
| W10 | Use of motor mowers ( <i>Motomäher</i> )                                                        |
| W11 | Mowing by hand                                                                                  |
| W12 | Scraping together by hand                                                                       |
| W13 | From a nature conservation perspective required additional cut                                  |
| W14 | Mandatory preservation of year-round old grass strips/areas on 5-20% of the area                |
| W15 | Additional bonus for wet/litter meadows                                                         |
| W16 | Animal-friendly mowing                                                                          |
| W17 | Stop of management from 15.03. or 01.04. until the fixed date                                   |
| W18 | Accompanying goats                                                                              |
| W19 | Management unit (=field size) maximum 2 ha                                                      |
| W20 | Draining of ponds ( <i>Sömmerung</i> ); maximum half of the pond is stocked ( <i>bespannt</i> ) |
| W21 | Stocking ( <i>Bespannung</i> ) from 01.03-15.09. and fast re-stocking                           |
| U01 | Abandonment of mechanical and thermal weed control                                              |
| U02 | Pre-grazing ( <i>Vorweide</i> ) of the area prohibited until end of April                       |
| U03 | Early mowing strips or areas possible on maximum 20% of the area                                |
| U04 | Stop dry fishing in two of five years                                                           |
| U05 | Fishing with a fishing rod is not allowed                                                       |
| U06 | Dry fishing until 31.12.                                                                        |

---

## B. Information for the sampling process

Table B1. Institutions contacted during the E-mail survey for the nature managers and additional remarks.

| <b>Institutions</b>                                                                                                      | <b>Additional remarks</b>                                                                                                                                                              |
|--------------------------------------------------------------------------------------------------------------------------|----------------------------------------------------------------------------------------------------------------------------------------------------------------------------------------|
| Upper nature conservation authority & lower nature conservation authorities                                              | Each upper authority of the seven Bavarian districts ( <i>Regierungsbezirke</i> ) was contacted with the request to forward the survey to the respective subordinate lower authorities |
| National parks                                                                                                           | Berchtesgaden and Bavarian Forest                                                                                                                                                      |
| Biosphere reserves                                                                                                       | Rhön and Berchtesgadener Land                                                                                                                                                          |
| Nature parks                                                                                                             | Information center Eichstätt (with the request to forward the survey to rangers and offices)                                                                                           |
| Area manager ( <i>Gebietsbetreuer</i> ):                                                                                 | Coordination office (with the request to forward the survey)                                                                                                                           |
| Wildlife habitat consultant ( <i>Wildlebensraumberater</i> ):<br>-                                                       | Coordination office (with the request to forward the survey)                                                                                                                           |
| Nature protection guards ( <i>Naturschutzwacht</i> ):                                                                    | Coordination office (with the request to forward the survey)                                                                                                                           |
| "AK Stadtgrün" ( <i>Stadtgrün</i> = city green)                                                                          | Survey was first sent to the Association of Bavarian Cities ( <i>Bayerischer Städtetag</i> ) with request to forward survey                                                            |
| Green agencies ( <i>Grünämter</i> )                                                                                      | Survey was first sent to the Association of Bavarian Cities ( <i>Bayerischer Städtetag</i> ) with request to forward survey                                                            |
| Landscape architects                                                                                                     | Bavarian coordination office of the Federation of German Landscape Architects ( <i>Bund Deutscher Landschaftsarchitekten</i> ) was point of contact                                    |
| Ecostation Straß                                                                                                         | In representation of the members of the Bavarian Academy for Nature Conservation and Landscape Management ( <i>Bayerische Akademie für Naturschutz und Landschaftspflege</i> )         |
| Associations for Landscape Management                                                                                    | State coordination of the Bavarian Association was contacted with the request to forward the survey                                                                                    |
| German Federation for the Environment and Nature Conservation                                                            | Big environmental association                                                                                                                                                          |
| State Association for Bird Protection ( <i>Landesbund für Vogelschutz</i> )                                              | Big environmental association                                                                                                                                                          |
| German Alpine Club ( <i>deutscher Alpenverein (DAV)</i> )                                                                | Smaller association                                                                                                                                                                    |
| Association for the protection of the mountain landscape ( <i>Verein zum Schutz der Bergwelt e.V.</i> )                  | Smaller association                                                                                                                                                                    |
| Association for landscape management and species protection ( <i>Verein für Landschaftspflege und Artenschutz e.V.</i> ) | Smaller association                                                                                                                                                                    |

Table B2. Counts of respondents working/engaging in the respective organization. Only respondents that answered the open-ended questions regarding improvements for subsidy possibilities were considered. Respondents could select multiple organizations; therefore, double counts exist.

| Organization                                                       | Type of engagement | Count |
|--------------------------------------------------------------------|--------------------|-------|
| National park                                                      | Employer nature    | 2     |
| Biosphere reserve                                                  | Employer nature    | 0     |
| Upper nature conservation authority                                | Employer nature    | 13    |
| Lower nature conservation authority                                | Employer nature    | 18    |
| District ( <i>Landkreis</i> )                                      | Employer nature    | 7     |
| Area manager                                                       | Employer nature    | 20    |
| Nature park                                                        | Employer nature    | 15    |
| Associations for Landscape Management                              | Employer nature    | 11    |
| Nature protection guards                                           | Employer nature    | 13    |
| Other (e.g., landscape architects and housing associations)        | Employer nature    | 20    |
| City administration                                                | Employer urban     | 8     |
| Municipal administration                                           | Employer urban     | 3     |
| Church community                                                   | Employer urban     | 0     |
| Nature protection association                                      | Honorary           | 31    |
| Nature protection guards (for lower nature conservation authority) | Honorary           | 18    |
| Municipality (maintenance of residential green)                    | Honorary           | 3     |
| Church community                                                   | Honorary           | 1     |
| Other (e.g., coordination center for bats)                         | Honorary           | 6     |



### C. Description of the categorization system for suggestion according to their novelty or pre-existence

Table C1. Detailed description of the categories, including subcategories, for the differentiation of new and existing ideas, and the number of suggestions in each category for nature managers (nat), farmer cluster 1 (f1), and farmer cluster 2 (f2).

| Codes                                                       | Description                                                                                                                                                                                                                                                                                                                                                                                                                                                                                                           | nat | f1  | f2  |
|-------------------------------------------------------------|-----------------------------------------------------------------------------------------------------------------------------------------------------------------------------------------------------------------------------------------------------------------------------------------------------------------------------------------------------------------------------------------------------------------------------------------------------------------------------------------------------------------------|-----|-----|-----|
| new and substantially different approaches for AES          | All answers that suggested new ways of developing AES, including ideas for changing the administrative system, and answers that suggested new measures which are not supported yet by the AES or the LNPR; answers were also seen as new if other support programs outside the AES might exist but if alternative support through AES or LNPR was conceivable; answers were additionally included if they could have been seen as adaptation but made a very specific description and mentioned exact monetary values | 40  | 123 | 87  |
| comments & buzzwords regarding existing AES                 | All one-word answers or very short phrases or comments without suggestions for improvement that addressed topics which are already part of the AES and LNPR; as an example "late cutting date" was classified as buzzword, but "later cutting dates" was classified as adaptation as "later" suggests that the existing cutting dates are too early                                                                                                                                                                   | 44  | 296 | 224 |
| suggested adaptations for existing AES (and administration) | All answers that suggested and improvement, a change, an adaptation or similar, related to existing measures, existing programs (AES and LNPR) or the administrative system and the set-up/orientation of AES; suggestions were only included if a negative effect could be largely excluded, otherwise they were not coded                                                                                                                                                                                           | 81  | 261 | 157 |
| general orientation                                         | All answers that suggested an adaptation of the general system, particularly the administration of the programs and the organization; some suggestions included topics that are related to AES, but the rules stem partly from the EU CAP like the contract length; these were still included in AES because a certain decision freedom exists within the countries                                                                                                                                                   | 43  | 113 | 69  |
| overall                                                     | All answers that suggested an adaptation of the general system, particularly the administration of the programs and the organization, that do not specifically target one program, e.g., either multiple programs were mentioned in the same answer, or no program was mentioned                                                                                                                                                                                                                                      | 39  | 99  | 63  |
| only KULAP                                                  | All answers that suggested an adaptation for the KULAP; ideas were only coded if they specifically included the term "KULAP" or "Cultural Landscape Program" or if there was a clear hint that the suggestion was only applicable in the KULAP, e.g., "3 ha rule"                                                                                                                                                                                                                                                     | 1   | 10  | 3   |

|                                    |                                                                                                                                                                                                                                                                                  |    |     |    |
|------------------------------------|----------------------------------------------------------------------------------------------------------------------------------------------------------------------------------------------------------------------------------------------------------------------------------|----|-----|----|
| only VNP                           | All answers that suggested an adaptation for the VNP; ideas were only coded if they specifically included the term “VNP” or “Nature Conservation Program” or if there was a clear hint that the suggestion was only applicable in the VNP                                        | 3  | 4   | 3  |
| Cultural Landscape Program (KULAP) | All answers that were linked to existing measures only within the Cultural Landscape Program                                                                                                                                                                                     | 14 | 106 | 48 |
| climate protection                 | All answers that were linked to existing measures only within the pillar for climate protection; a link was established if answers mentioned the codes in this pillar like “B20” or if answers described one of the measures, topics, or procedures within this pillar           | 0  | 4   | 2  |
| soil & water protection            | All answers that were linked to existing measures only within the pillar for soil & water protection; a link was established if answers mentioned the codes in this pillar like “B30” or if answers described one of the measures, topics, or procedures within this pillar      | 1  | 43  | 8  |
| biodiversity                       | All answers that were linked to existing measures only within the pillar for biodiversity; a link was established if answers mentioned the codes in this pillar like “B43”, “B48”, or if answers described one of the measures, topics, or procedures within this pillar         | 2  | 35  | 16 |
| cultural landscape                 | All answers that were linked to existing measures only within the pillar for cultural landscape; a link was established if answers described one of the measures, topics, or procedures within this pillar like “8 € per tree”; codes were not mentioned                         | 1  | 7   | 10 |
| organic farming                    | All answers that were linked to organic farming, including terms like “organic”, “organic farming”, “organic agriculture”; apart from the mentioned terms, a link was established if answers mentioned the respective code “B10”                                                 | 8  | 12  | 9  |
| overlapping                        | All suggestions that were addressing multiple pillars at the same time within the KULAP or that were only an adaptation to the KULAP (and already included in the VNP) and therefore not yet included in any pillar like “cutting date 15.06. in the Cultural Landscape Program” | 3  | 6   | 3  |
| Nature Conservation Program (VNP)  | All answers that were linked to existing measures only within the Nature Conservation Program                                                                                                                                                                                    | 7  | 3   | 1  |
| biotope type arable fields         | All answers that were linked to existing measures for the biotope type arable fields; a link was established if answers described one of the measures, topics, or procedures for this biotope type                                                                               | 0  | 1   | 0  |

|                           |                                                                                                                                                                                                                                                                                                                                                                                                                                                                |    |    |    |
|---------------------------|----------------------------------------------------------------------------------------------------------------------------------------------------------------------------------------------------------------------------------------------------------------------------------------------------------------------------------------------------------------------------------------------------------------------------------------------------------------|----|----|----|
| biotope type pastures     | All answers that were linked to existing measures for the biotope type pastures; a link was established if answers described one of the measures, topics, or procedures for this biotope type; since measures for “pastures” also exist within the KULAP, answers were mostly classified under the code <i>equivocal (KULAP &amp; VNP)</i> as a clear linkage to the VNP only was missing in most cases                                                        | 1  | 1  | 0  |
| biotope type meadows      | All answers that were linked to existing measures for the biotope type meadows; a link was established if answers described one of the measures, topics, or procedures for this biotope type; since “meadows” and “grassland” are often used replaceable and measures for “meadows” also exist within the KULAP, answers were mostly classified under the code <i>equivocal (KULAP &amp; VNP)</i> as a clear linkage to the VNP only was missing in most cases | 3  | 1  | 0  |
| biotope type ponds        | All answers that were linked to existing measures for the biotope type ponds; a link was established if answers described one of the measures, topics, or procedures for this biotope type;                                                                                                                                                                                                                                                                    | 0  | 0  | 1  |
| additional services       | All answers that were linked to additional services that can be combined with measures of the VNP; as similar measures exist in both programs or described suggestions are also part of measures in the KULAP, e.g., “abandonment of fertilizers”, answers were mostly classified under the code <i>equivocal (KULAP &amp; VNP)</i> as a clear linkage to the VNP only was missing in most cases                                                               | 1  | 1  | 0  |
| overlapping               | All suggestions that were addressing multiple pillars at the same time within the VNP or that were only an adaptation to the VNP (and already included in the KULAP) and therefore not yet included in any pillar                                                                                                                                                                                                                                              | 2  | 0  | 0  |
| equivocal (KULAP & VNP)   | All answers that were linked to measures, topics, or procedures relevant in both programs and where no clear link to a single program could be established, including terms like “cutting frequency”, “conversion of cropland into grassland”, “better support for the abandonment of pesticides”, etc.                                                                                                                                                        | 12 | 39 | 33 |
| combination possibilities | All answers that addressed adaptations, ideas, or comments regarding combination possibilities between and among programs, mostly between and within the KULAP, VNP and organic farming, particularly including terms like “combination possibility”, “better combine” or similar, combined with the names of the programs                                                                                                                                     | 2  | 11 | 10 |

Landschaftspflege- und  
Naturparkrichtlinien

All answers that were primarily linked to the goals of the LNPR and had a focus on species and biotopes or specific landscapes like bogs and that did not have a clear linkage to measures of the VNP; for some classified ideas, support programs might already exist, due to the high number of regional or local support programs for single species, but they could not all be identified in this thesis

6

4

8

D. Thematic categorization system with code frequencies for farmers and nature managers

Table D1. Detailed description of all thematic categories. These descriptions are equally applicable to the categorization system of the farmers and nature managers. Codes are indented according to their level (subcategories). Codes in level 4 marked with a star (\*) did not exist in the categorization system of the nature managers and were summarized under the respective code in level 3, as absolute numbers were too low for a further division into the subcategories.

| Code-Level 1            | 2                               | 3                             | 4                                                                                                                                                                        | Comment                                                                                                                                                                                              |                                                                                                                                                                                                                                                  |
|-------------------------|---------------------------------|-------------------------------|--------------------------------------------------------------------------------------------------------------------------------------------------------------------------|------------------------------------------------------------------------------------------------------------------------------------------------------------------------------------------------------|--------------------------------------------------------------------------------------------------------------------------------------------------------------------------------------------------------------------------------------------------|
| agriculture & landscape | landscape structure             | field margins                 | buzzwords field margins*                                                                                                                                                 | All one-word answers/one phrase without additional information, primarily the words “field margins” or “forest field margins”                                                                        |                                                                                                                                                                                                                                                  |
|                         |                                 |                               | comments/suggestions for field margins*                                                                                                                                  | All comments and (new) suggestions for adaptations related to field margins including terms like “fields margins” combined with terms like “protection”, “maintenance”, “preservation”, “more”, etc. |                                                                                                                                                                                                                                                  |
|                         | establishment of field margins* |                               | All answers related to the establishment of field margins, including terms like “field margins” combined with terms like “establish”, “establishment”, “construct”, etc. |                                                                                                                                                                                                      |                                                                                                                                                                                                                                                  |
|                         | hedges                          |                               | buzzwords hedges*                                                                                                                                                        | All answers related to hedges, primarily including the word “hedges”                                                                                                                                 |                                                                                                                                                                                                                                                  |
|                         | biotopes/ structural elements   | hedges                        | comments/suggestions for hedges*                                                                                                                                         | All comments and (new) suggestions for adaptations related to hedges including terms like “hedges” combined with terms like “protection”, “maintenance”, “preservation”, “removal”, “more”, etc.     |                                                                                                                                                                                                                                                  |
|                         |                                 |                               | establishment of hedges*                                                                                                                                                 | All answers related to the establishment of hedges, including terms like “hedges” combined with terms like “establish”, “establishment”, “plant”, etc.                                               |                                                                                                                                                                                                                                                  |
|                         |                                 | biotopes/ structural elements | biotopes/ structural elements                                                                                                                                            |                                                                                                                                                                                                      | All answers related to biotopes and structural elements including terms like “ponds”, “dead wood (piles)”, “stone walls”, “field shrubs”, “alleys”, “wet areas”, “nature zones”, etc.; hedges and field margins were excluded from this category |

|                                    |                                                                   |                                                                                                                                                                                                                                                                                        |
|------------------------------------|-------------------------------------------------------------------|----------------------------------------------------------------------------------------------------------------------------------------------------------------------------------------------------------------------------------------------------------------------------------------|
|                                    | buzzwords biotopes/<br>structural elements*                       | All one-word answers/one phrase without additional information, like the words “biotopes”, “landscape elements”, “field shrubs”, etc.                                                                                                                                                  |
|                                    | comments/<br>suggestions for<br>biotopes/<br>structural elements* | All comments and (new) suggestions for adaptations related to biotopes and landscape elements including terms like “ponds”, “dead wood (piles)”, “stone walls”, “field shrubs”, “alleys”, “wet areas”, “nature zones”, etc., combined with terms like “support”, “allow”, “more”, etc. |
|                                    | establishment of<br>biotopes/ structural<br>elements*             | All answers related to the establishment of biotopes and landscape elements including terms like “ponds”, “dead wood (piles)”, “stone walls”, “field shrubs”, “alleys”, “wet areas”, “nature zones”, etc., combined with terms like “establish”, “establishment”, “plant”, etc.        |
| biotope networks                   |                                                                   | All answers related to biotope networks, primarily the word “biotope” combined with terms like “connect”, “network”, etc.                                                                                                                                                              |
| landscape<br>conservation          |                                                                   | All answers related to landscape conservation, including terms like “(cultural) landscape preservation/conservation”, “renaturation”, “diverse landscape”, etc.                                                                                                                        |
| small-scaled<br>structures/ fields |                                                                   | All answers related to small fields and small structures, often combined with terms like “(more) support”, “preserve”, etc.                                                                                                                                                            |
| wildflower areas                   |                                                                   | All answers related to wildflower areas and flower strips, primarily including the terms “wildflower areas”, “flower strips”                                                                                                                                                           |
|                                    | buzzwords wildflower<br>areas*                                    | All one-word answers/one phrase without additional information, primarily the words “wildflower areas”, “flower strips”                                                                                                                                                                |
|                                    | comments/<br>suggestions for<br>wildflower areas*                 | All comments and (new) suggestions for adaptations related to wildflower areas and flower strips including terms like “wildflower areas”, “B48”, “flower strips”, “colorful fallow”, “wild herbs”, etc., combined with terms like “(more) support”, “network”, “flexibility”, etc.     |
|                                    | establishment of<br>wildflower areas*                             | All answers related to the establishment of wildflower areas and flower strips, including terms like “wildflower areas”, “flower strips”, etc., combined with terms like “establish”, “sowing”, etc.                                                                                   |
| animal husbandry                   |                                                                   | All answers related to animal husbandry, including terms like “animal husbandry”, “livestock (unit)”, “grazing”, etc.                                                                                                                                                                  |

|           |                                        |                                                                                                                                                                                                                                                                                                                                                                                                                                                                   |
|-----------|----------------------------------------|-------------------------------------------------------------------------------------------------------------------------------------------------------------------------------------------------------------------------------------------------------------------------------------------------------------------------------------------------------------------------------------------------------------------------------------------------------------------|
|           | extensive animal husbandry             | All answers related to extensive animal husbandry, including terms like “livestock”, “animal”, “factory farming” ( <i>Massentierhaltung</i> ) combined with terms like “limit”, “limitation”, “maximum”, “extensive”, etc.; not to confuse with the code <i>linkage production-livestock area</i>                                                                                                                                                                 |
|           | animal feed                            | All answers related to animal feed, including terms like “feed”, “feed import”, “local legumes”, “local feed”, etc.                                                                                                                                                                                                                                                                                                                                               |
|           | animal welfare                         | All answers related to animal welfare, including terms like “animal welfare”, “appropriate”, etc., combined with “animals”, “livestock transport”, etc.                                                                                                                                                                                                                                                                                                           |
|           | linkage production-livestock area      | All answers related to the link between livestock units and production area including terms like “livestock unit per ha”, “livestock unit less than”, “area-linked livestock”; compared to the code <i>extensive animal husbandry</i> a particular focus was put on the occurrence of the word “livestock unit” (livestock unit is usually measured per hectare) combined with words like “area”, “ha” or a certain number indicating the maximum livestock units |
|           | support for grazing                    | All answers related to the support for grazing, primarily including the term “grazing” combined with “(more) support”; those segments were not included under the code ( <i>agricultural</i> ) <i>policy</i>                                                                                                                                                                                                                                                      |
|           | grazing                                | All answers related to grazing, primarily including terms like “grazing”, “grazing systems”, “grazing animals”, etc.                                                                                                                                                                                                                                                                                                                                              |
|           | other suggestions for animal husbandry | All answers that mentioned “animal husbandry” or terms related to animal husbandry, but did not fit in any of the other categories                                                                                                                                                                                                                                                                                                                                |
| grassland |                                        |                                                                                                                                                                                                                                                                                                                                                                                                                                                                   |
|           | flower meadows                         | All answers related to grassland, including terms like “grassland”, “meadows”, etc.<br>All answers related to flower meadows, including the term “flower meadows”; in contrast to wildflower area, a particular focus was put on the word “meadow”                                                                                                                                                                                                                |
|           | demand/support for grassland           | All answers related to the demand for grassland, including one-word answers with “grassland” or combined with “preservation”, and also the (financial) support, including words like “grassland”, etc., combined with “more”, “support”, etc.; segments with support were not included under the code <i>policies &amp; design</i>                                                                                                                                |
|           | extensive grassland                    | All answers related to extensive grassland, primarily the term “grassland” combined with terms like “extensive”, “less fertilization”, “without fertilization”, etc.                                                                                                                                                                                                                                                                                              |

|             |                                               |                                                                                                                                                                                                                                                                                                       |
|-------------|-----------------------------------------------|-------------------------------------------------------------------------------------------------------------------------------------------------------------------------------------------------------------------------------------------------------------------------------------------------------|
| arable land | biodiverse meadows/pastures                   | All answers related to biodiverse meadows or pastures, primarily including the terms “meadows” and “pastures” combined with “biodiversity” or “biodiverse”; not to confuse with the code <i>flower meadows</i> where a particular focus was put on the occurrence of the term “flower meadows” itself |
|             | cutting frequency                             | All answers related to the cutting frequency of grassland or meadows, including terms like “cutting frequency”, “mowing frequency”, “maximum cuts”, “cutting intensity”, etc., sometimes combined with “grassland” or similar                                                                         |
|             | cutting date                                  | All answers related to cutting date of grassland or meadows, including terms like “cutting date”, “mowing date”, “late cut”, “later cut”, “maximum cuts”, etc., sometimes combined with “grassland” or similar                                                                                        |
|             | animal-/insect-friendly mowing                | All answers related to mowing practices that are beneficial for insects and animals, including terms like “animal friendly”, “insect friendly”, “mulching”, “double cutter bar”, etc.                                                                                                                 |
|             | other suggestions for grassland               | All answers that mentioned “grassland”, “meadows” or related terms, but did not fit in any of the other categories                                                                                                                                                                                    |
|             | design of mowing practices                    | All answers related to the topic how mowing can be performed, including terms like “rotating mowed areas”                                                                                                                                                                                             |
| arable land | cultivation of mixed crops/perennials         | All answers related to arable land/cropland, especially farming practices, including a variety of terms explained in the respective categories                                                                                                                                                        |
|             | holistic/innovative agricultural systems      | All answers related to the cultivation of mixed crops including terms like “mixed crops on one field” and perennial crops, including the term “perennials”                                                                                                                                            |
|             | reduction of mono-cultures & corn cultivation | All answers related to agricultural systems that incorporate innovative ideas including a more holistic thinking, e.g., terms like “permaculture”, “three field crop rotation”, “agroforestry”, etc.                                                                                                  |
|             | undersown crops                               | All answers related to the reduction of monocultures and the cultivation of corn as an example for a monoculture, including terms like “monocultures” or “corn” combined with terms like “not any”, “limit”, “maximum”, “less”, etc.                                                                  |
|             |                                               | All answers related to undersown crops, primarily the word “undersown crops”                                                                                                                                                                                                                          |



|                                                 |                                               |                                                                                                                                                                                                                                  |
|-------------------------------------------------|-----------------------------------------------|----------------------------------------------------------------------------------------------------------------------------------------------------------------------------------------------------------------------------------|
| orchards                                        |                                               | All answers related to orchards, including terms like “fruit trees”, “orchards”, etc., combined with terms like “support”, “more”, “maintenance”, etc.                                                                           |
| fallow of arable land                           |                                               | All answers related to fallow of arable land, including terms like “set-aside (areas)”, “fallow”, “not cultivate”, etc.                                                                                                          |
| crop rotation                                   |                                               | All answers related to crop rotation, including terms like “diverse crop rotation”, “multiple crop rotation”                                                                                                                     |
|                                                 | buzzwords crop rotation*                      | All one-word answers/one phrase without additional information, like “diverse crop rotation”, “multiple crop rotation”, “wide crop rotation”, “changing crop rotation”, etc.                                                     |
|                                                 | comments/suggestions for crop rotation*       | All comments and (new) suggestions for adaptations related to crop rotation including terms like “diverse crop rotation”, “multiple crop rotation”, etc., combined with terms like “support”, “extend”, etc.                     |
| soil protective measures (no-till/reduced till) |                                               | All answers related to soil protective measures, particularly including terms like “no-till” or “reduced till”, sometimes combined with the term “soil cultivation”; not to confuse with the category for <i>soil protection</i> |
| catch crops                                     |                                               | All answers related to catch crops, including terms like “catch crops”, “winter soil cover”, “winter catch crops”, etc.                                                                                                          |
|                                                 | Buzzwords catch crops*                        | All one-word answers/one phrase without additional information, primarily the terms “catch crops”, “winter soil cover”, “winter catch crops”                                                                                     |
|                                                 | comments/suggestions for catch crops*         | All comments and (new) suggestions for adaptations related to catch crops including terms like “catch crops”, “winter soil cover”, “winter catch crops”, etc., combined with terms like “support”, “extend”, “cultivate”, etc.   |
| humus/soil fertility                            |                                               | All answers related to humus and soil fertility, including the terms “humus” or “soil fertility”                                                                                                                                 |
|                                                 | buzzwords humus formation*                    | All one-word answers/one phrase without additional information, primarily the word “humus formation”                                                                                                                             |
|                                                 | comments/suggestion for humus/soil fertility* | All comments and (new) suggestions for adaptations related to humus and soil fertility, including the terms “humus (formation)” and “soil fertility” combined with terms like “support”, “improvement”, “preservation”, etc.     |
| fertilizer                                      |                                               | All answers related to fertilizers, including terms like “fertilizer”, “manure”, “dung”, “nitrogen”, “ammonium”, etc.                                                                                                            |

|                                                        |                                      |                                                                                                                                                                                                                                                      |
|--------------------------------------------------------|--------------------------------------|------------------------------------------------------------------------------------------------------------------------------------------------------------------------------------------------------------------------------------------------------|
|                                                        | other comments/<br>suggestions*      | All comments and (new) suggestions for adaptations related to fertilizers, that did not fit in any of the other subcategories for fertilizers                                                                                                        |
|                                                        | methods for fertilizer<br>reduction* | All answers related to the reduction of fertilizer, including terms like “fertilizer”, “manure”, “dung” combined with terms like “reduction”, “lower application”, “less”, “limitation”, “maximum”, “efficient”, etc.                                |
|                                                        | ban/abandonment<br>manure only*      | All answers with the terms “manure” or “dung” combined with “ban”, “abandonment” or “not any”                                                                                                                                                        |
|                                                        | ban/abandonment<br>fertilizers*      | All answers with the terms “fertilizer”, “mineral fertilizer”, “artificial fertilizer” or similar combined with “ban”, “abandonment” or “not any”                                                                                                    |
| pesticides                                             |                                      | All answers related to pesticides, herbicides, and fungicides, including terms like “pesticides”, “herbicides”, “fungicides”, “(chemical) plant protection”, etc.                                                                                    |
|                                                        | other comments/<br>suggestions*      | All comments and (new) suggestions for adaptations related to pesticides, that did not fit in any of the other subcategories for pesticides                                                                                                          |
|                                                        | methods for pesticide<br>reduction*  | All answers related to the reduction of pesticides including terms like “pesticides”, “herbicides” combined with terms like “minimal application”, “limit application”, “less”, etc.; also terms like “mechanical weed control”, “beneficials”, etc. |
|                                                        | ban/abandonment<br>pesticides*       | All answers with the terms “pesticides”, “spraying” or similar combined with “ban”, “abandonment” or “not any”                                                                                                                                       |
| future-oriented<br>agricultural<br>practices/<br>crops |                                      | All answers related to practices or crops that address future considerations, including terms like “water efficient crops”, “drones”, “non-mutated crops”, “disease-resistant”, “climate resistant”, etc.                                            |
| legumes/<br>protein crops                              |                                      | All answers related to legumes and protein crops, including terms like “legumes”, “protein crops”, “clover”, “lucerne”, etc.                                                                                                                         |
| sowing practices                                       |                                      | All answers related to sowing practices, including terms like “mulch seeding”, “direct seeding”, “strip seeding”, “seeding intensity”, etc.                                                                                                          |
| conversion<br>cropland -<br>grassland (both<br>ways)   |                                      | All answers related to the conversion of cropland into (permanent) grassland and grassland into cropland, including terms like, “grassland conversion”, “cropland in grassland”, etc.                                                                |
| status of<br>agricultural fields                       |                                      | All answers related to the status of agricultural fields, especially in relations to the conversion rules after five years, including terms like “agricultural status”, “conversion”, combined with “remove 5-years rule”, “no conversion”, etc.     |

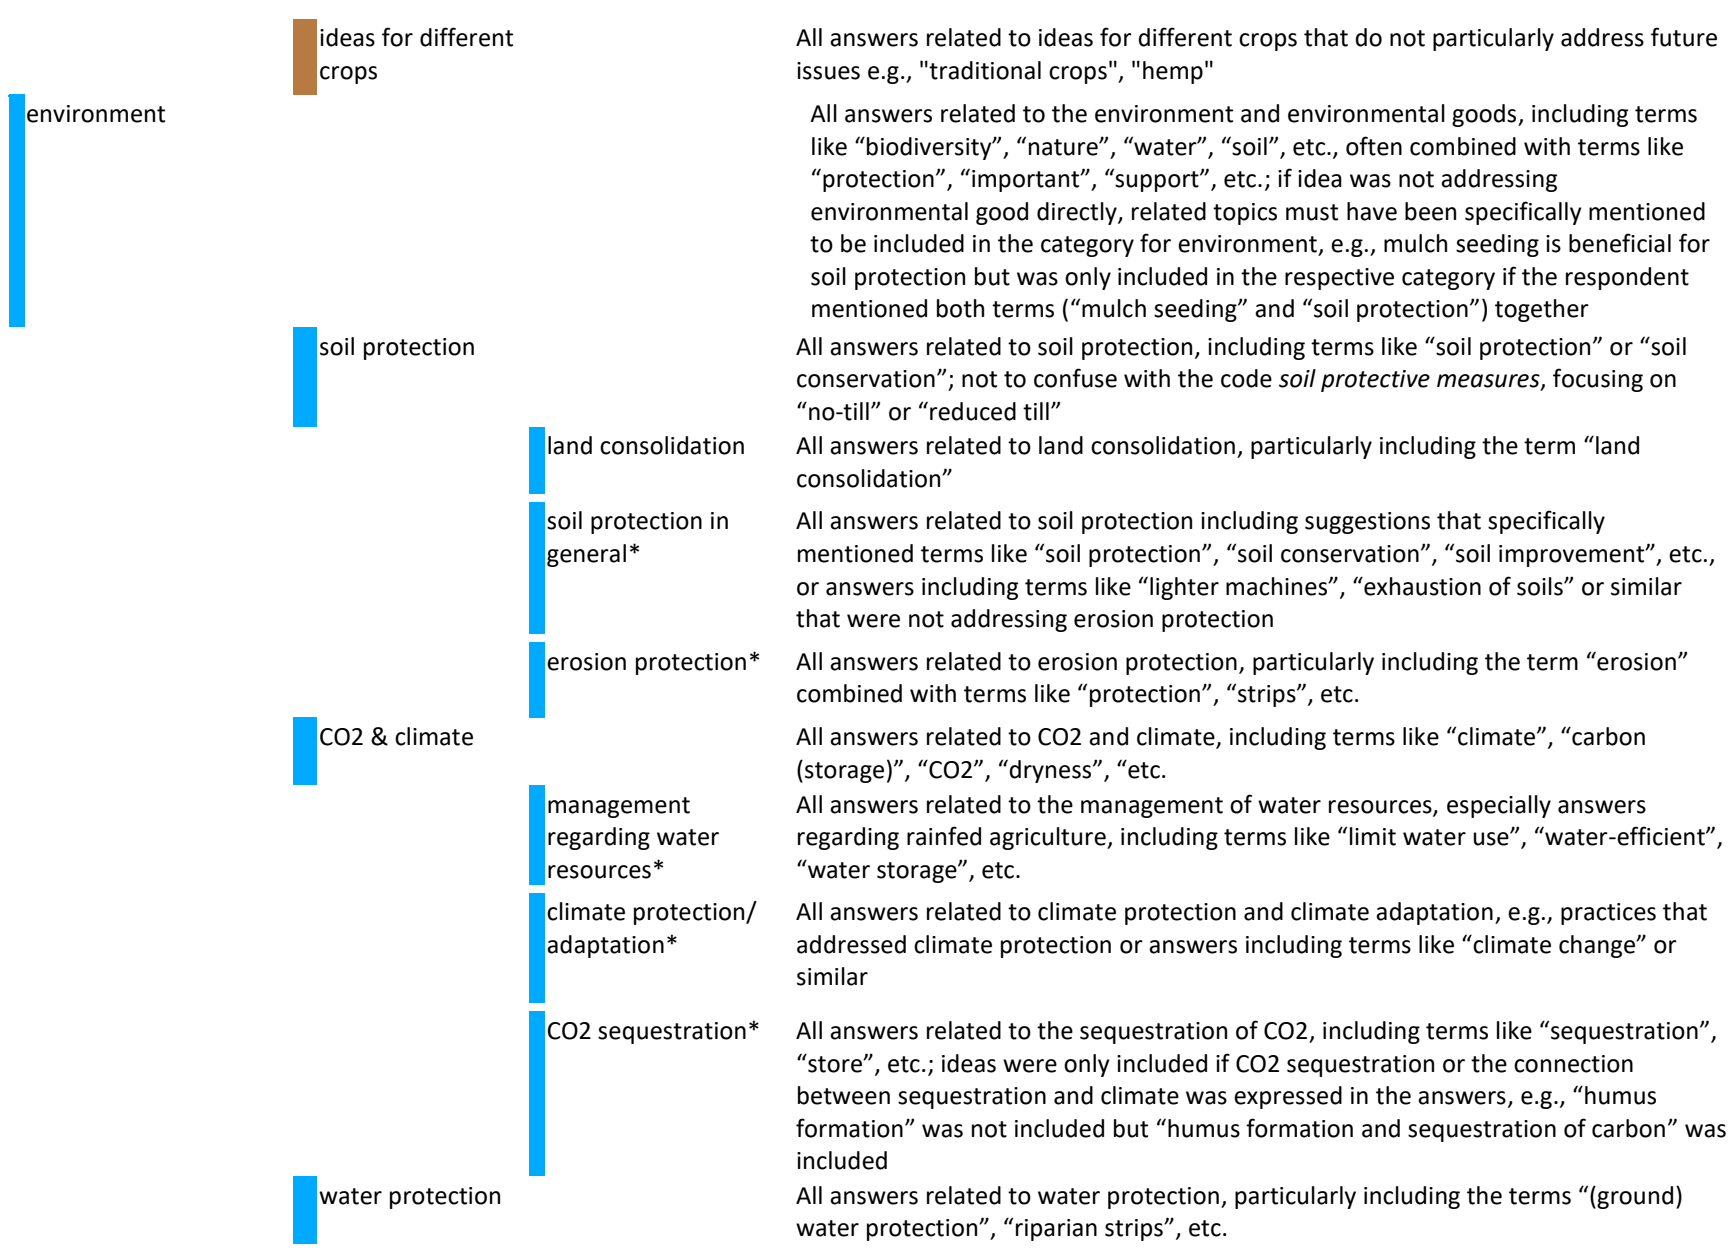

|                                                |                                               |                                                                                                                                                                                                                                                                                                                                                                                                     |
|------------------------------------------------|-----------------------------------------------|-----------------------------------------------------------------------------------------------------------------------------------------------------------------------------------------------------------------------------------------------------------------------------------------------------------------------------------------------------------------------------------------------------|
| biodiversity                                   | buzzwords water protection                    | All one-word answers/one phrase without additional information, primarily the word “(ground) water protection”                                                                                                                                                                                                                                                                                      |
|                                                | riparian strips*                              | All answers related to riparian strips; ideas were only coded if there was a clear relation, e.g., through terms like “riparian”, “bank”, etc., combined with terms like “strip” or similar                                                                                                                                                                                                         |
|                                                | suggestions for water protection*             | All comments and (new) suggestions for adaptations related to water protection in general; ideas were only coded if answers included specifically terms like “water protection”, “water bodies”, etc., combined with “protection” or similar or had a clear linkage, including terms like “extensification of wet areas” or similar                                                                 |
| environmental/<br>nature/species<br>protection | Comments/<br>suggestions for<br>biodiversity* | All answers related to biodiversity, particularly including terms like “biodiversity”, “biodiverse”, “species-rich”, etc.; not to confuse with species protection summarized under the codes for <i>environmental/nature/species protection</i><br>All one-word answers/one phrase without additional information, primarily the words “biodiversity”, “biodiverse”, “species diversity” or similar |
|                                                | buzzwords<br>biodiversity*                    | All comments and (new) suggestions for adaptations related to biodiversity, including terms like “biodiverse”, “biodiversity”, “species diversity”, etc., combined with terms like “grassland”, “support”, “keep”, etc.                                                                                                                                                                             |
|                                                | bees*                                         | All answers related to environmental, nature and/or species protection; ideas were only coded if answers specifically included the terms “environmental”, “species”, “nature” or related terms combined with terms like “protection”, “importance”, etc.<br>All answers related to bees; ideas were only included if answers specifically included the terms “bees” or “apiculture”                 |
|                                                | other (forest) animals                        | All answers related to (forest) animals; ideas were only coded if answers specifically included terms like “wildlife”, “beavers”, “rabbits”, “wolves”, etc., combined with “protection”, “quiet zones”, etc.; answers including the word “hamster” were coded in a separate category as some answers addressed specific hamster programs                                                            |
|                                                | hamsters*                                     | All answers related to hamsters; ideas were only coded if answers included the term “hamster”                                                                                                                                                                                                                                                                                                       |
|                                                | birds                                         | All answers related to birds; ideas were only coded if the answers included terms like “birds”, “bird species”, “ground-breeding birds”, etc., or specific bird species                                                                                                                                                                                                                             |

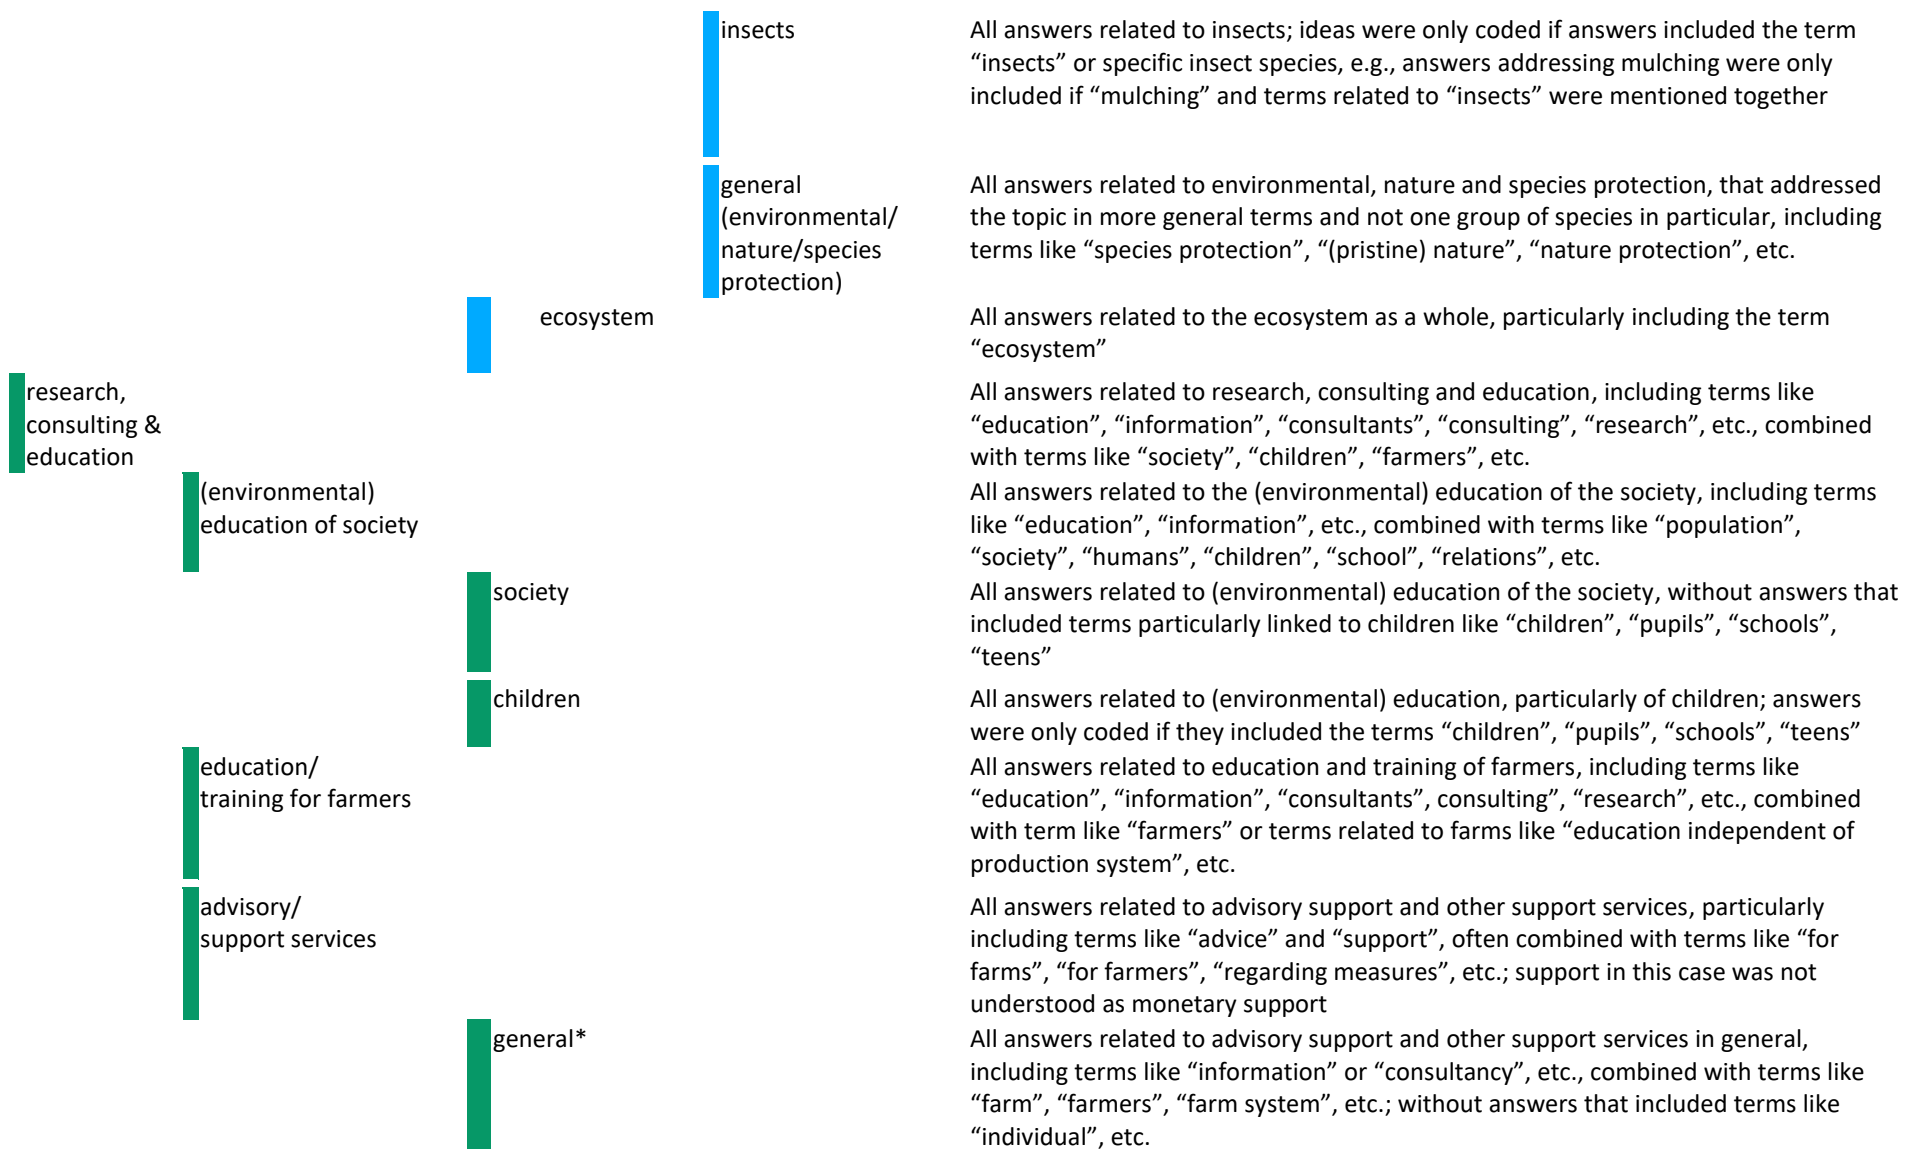

|                   |                                                           |                       |                                                                                                                                                                                                                                                                                                                                                      |
|-------------------|-----------------------------------------------------------|-----------------------|------------------------------------------------------------------------------------------------------------------------------------------------------------------------------------------------------------------------------------------------------------------------------------------------------------------------------------------------------|
| policies & design | research/<br>alternative methods                          | for individual farms* | All answers related to individual advisory support and individual support services, particularly including terms like “individual”, “personal”, “on-site”, etc., combined with terms like “information”, “consultancy”, “concepts”, etc.                                                                                                             |
|                   |                                                           |                       | All answers related to research and out-of-the-box thinking beyond the pure agricultural system, including terms like “research”, “solar and crops”, etc.                                                                                                                                                                                            |
|                   |                                                           |                       | All answers related to policies, politics, and the design of support programs with relation to AES, including regulations, policies and subsidies/subsidy programs with a variety of suggestions and terms explained in the respective categories                                                                                                    |
|                   | importance of regionality                                 |                       | All answers related to the importance of regional production, regional products, and feed imports, including terms like “production in Bavaria”, “self produced feed”, “production for own use”, “regionality”, “regional programs”, “less foreign feed”, etc.                                                                                       |
|                   | public/<br>municipal authorities/<br>politics             |                       | All answers related to public and municipal authorities and politics; ideas were particularly coded when they included terms like “municipality”, “authority”, “AELF” or similar                                                                                                                                                                     |
|                   | reduction in<br>bureaucratic/<br>administrative efforts   |                       | All answers related to the reduction of bureaucracy and the reduction of administrative efforts regarding measures and programs, including terms like “bureaucracy”, “administration”, “effort”, etc., combined with terms like “less complex”, “reduction”, “less”, “complicated”, etc.                                                             |
|                   | flexibility/<br>practicability/regionality<br>of programs |                       | All answers related to the wish for more flexible and practicable measures and a better regional adaptation, including terms like “flexibility”, “practicability”, “easier”, “less complicated”, “more regional”, “adapted to regional conditions”, etc., combined with terms like “programs”, “measures”, “KULAP”, “VNP” or specific measures, etc. |
|                   | demand for stricter<br>regulations                        |                       | All answers related to the demand for stricter regulations; ideas were particularly coded when they included terms like “control”, “check”, “ban”, “strict”, “mandatory”, “law” or similar                                                                                                                                                           |
|                   | desire for autonomy/<br>exchange                          |                       | All answers related to the desire for autonomy and exchange (particularly between farmers and the society), including terms like “voluntary”, “exchange”, “let farmer work”, “reduce influence of NGOs”, “decision-making freedom for farmers”, “talk together”, “include experiences”, etc.                                                         |
|                   | criticism of existing<br>regulations                      |                       | All answers related to criticism of existing regulations and programs; ideas were only coded if signs for criticism could be observed in the wording, including exclamation marks, irony, or terms like “exploited”, “incomprehensible”, “(not) meaningful”, “abolish”, “absurd” or similar                                                          |

|                                               |                                                                                                                                                                                                                                                                                                                                                                                                                                                                                                                                                     |
|-----------------------------------------------|-----------------------------------------------------------------------------------------------------------------------------------------------------------------------------------------------------------------------------------------------------------------------------------------------------------------------------------------------------------------------------------------------------------------------------------------------------------------------------------------------------------------------------------------------------|
| future orientation of the agricultural policy | All answers related to the future orientation and direction of the agricultural policy; this category is very diverse and summarizes also topics that were related to the agricultural policy but where no other category was suitable; ideas that were coded addressed the EU CAP, topics outside the agricultural sphere like “support for diversification”, topics related to a new way of thinking like “support for quality instead of quantity” or included terms like “aim”, “direction”, “until now”, “abolish”, “overview”, “create”, etc. |
| price policy of agricultural products         | All answers related to the price policy of agricultural products and ideas that criticize the cheap prices, including terms like “better/higher/fairer prices”, “adequate prices system”, “prices stability”, etc.                                                                                                                                                                                                                                                                                                                                  |
| (regional) marketing of agricultural products | All answers related to the (regional) marketing of agricultural products; ideas were only coded if they addressed specifically marketing, including terms like “better marketing possibilities”, “support for direct marketing”, “regional marketing”, etc.; if answers only addressed regionality they were coded as <i>importance of regionality</i>                                                                                                                                                                                              |
| organic farming as solution                   | All answers related to organic farming, particularly including terms like “organic”, “organic farming”, “organic agriculture” or similar; ideas including terms related to organic that were combined with terms like “support” or similar were coded as <i>support for organic farming</i>                                                                                                                                                                                                                                                         |
| extensification as solution                   | All answers related to extensification, including terms like “extensification”, “extensive”, “less intensive”, “lower intensity”, etc., combined with terms like “agriculture”, “area”, “management”, etc.; ideas for extensive grassland were not included here but coded as <i>extensive grassland</i>                                                                                                                                                                                                                                            |
| biogas production                             | All answers related to the production of biogas and biogas substrate, including terms like “biogas”, “energy crops”, “corn”, etc., combined with terms like “limit”, “not any”, “reduction”, “wildflower areas”, etc.                                                                                                                                                                                                                                                                                                                               |
| reinforcement of individuality                | All answers related to ideas that expressed the wish to reinforce more individuality, including terms like “own ideas”, “individual seed mixtures”, “farm specific measures”, etc.; if ideas included terms related to advisory services it was also coded thereunder as <i>individual farms</i>                                                                                                                                                                                                                                                    |
| planning and legal certainty                  | All answers related to planning and legal certainty with regard to programs, regulations, and monetary support, including terms like “long-term”, “longer-term”, “more binding”, “continuity”, “earlier announcement”, etc., combined with terms like “support”, “planning”, “measures”, etc.                                                                                                                                                                                                                                                       |

financial support & support programs

design of AES

time frame\*

area setting\*

area dependent regulations\*

future-oriented design of AES\*

Cultural Landscape Program (KULAP)

Nature Conservation Program (VNP)

Greening

support for organic farming

All answers related to financial support and support programs in a more narrow sense, e.g., flexibility of programs is also related to support programs however this category focuses more directly on ideas for mainly financial support and specific programs like the AES, including a variety of terms explained in the respective categories

All answers related to the design of AES in a narrow sense, with respect to time frame, area setting and area dependent regulations

All answers related to the design of AES in a narrow sense, with respect to time frame, area setting and area dependent regulations, including terms like “area-dependent”, “time frame”, “area setting”, etc., often combined with terms related to measures or the AES in general

All answers related to the time frame within AES, including terms like “time frame”, “year to year”, etc.

All answers related to the area setting within AES, including terms like “area setting”, “all areas”, “easier accessibility”, etc., combined with terms like “adaptation”, “extension”, etc.

All answers suggesting ideas for the restructuring of AES not related to time, frame, area setting or area-dependency

All answers related to the Kulturlandschaftsprogramm; ideas were only coded if measures within the Kulturlandschaftsprogramm were specifically addressed, including (the codes of) measures like “B43” or if answers included the terms “KULAP” or “Kulturlandschaftsprogramm”

All answers related to the Vertragsnaturschutzprogramm; ideas were only coded if measures within the Vertragsnaturschutzprogramm were specifically addressed, including (the codes of) measures like “H11” or if answer included the terms “VNP” or “Vertragsnaturschutzprogramm”

All answers related to the Greening; ideas were only coded if answers included the term “Greening” or related terms like “ecological focus areas”

All answers related to the (financial) support of organic farming, including terms like “organic”, “organic agriculture”, etc., combined with terms like “support”, “money”, “bonus”, etc.; answers were either coded in this category if they included “support” or related terms or they were coded as *organic farming as solution* (no double coding between the two codes)



|                                                   |                                                                                                                                                                                                                                                                                                                                                                                                                                                                                                                                                                                                                                                                              |
|---------------------------------------------------|------------------------------------------------------------------------------------------------------------------------------------------------------------------------------------------------------------------------------------------------------------------------------------------------------------------------------------------------------------------------------------------------------------------------------------------------------------------------------------------------------------------------------------------------------------------------------------------------------------------------------------------------------------------------------|
| <p>combination possibilities between programs</p> | <p>All answers related to the possibility of combining different programs and combining measures within programs, including term like “combination possibilities”, “combine”, etc., combined with terms like “programs”, “measures”, “KULAP”, “VNP”, “organic farming”, etc.</p>                                                                                                                                                                                                                                                                                                                                                                                             |
| <p>(higher) support dependent on farm size</p>    | <p>All answers related to (higher) support dependent on farm size, particularly including ideas with (higher) support for small farms</p>                                                                                                                                                                                                                                                                                                                                                                                                                                                                                                                                    |
| <p>result-based (support) systems</p>             | <p>All answers related to support based on success and performance, including ideas for various criteria without profit/monetary orientation, including terms like “success-oriented”, “success-based”, “according to biodiversity”, “coupled to environmental protection”, etc., often combined with terms like “support”, “subsidies”, etc.</p>                                                                                                                                                                                                                                                                                                                            |
| <p>demand for higher financial support</p>        | <p>All answers related to the demand expressed for higher financial support; financial support was seen in a narrow sense, which means that ideas were only coded when there was a clear connection to the financial or monetary side, expressed in terms like “more money”, “financial improvement”, “higher bonuses”, “better remuneration”, etc.; contrary “more support” was not included because it could also imply advisory support</p>                                                                                                                                                                                                                               |
| <p>support for nature sustaining practices</p>    | <p>All answers related to (agricultural) practices with the idea of sustaining/ improving the natural environment; this category comprises (farming) practices particularly in combination with the word “support”, like “support for catch crops”, “support for orchards”, “support for water protection”, etc., with the aim to stress the importance of/the need for support expressed in the answers</p>                                                                                                                                                                                                                                                                 |
| <p>support for different aspects</p>              | <p>All answers related to the support of different aspects; similarly to the code <i>support for nature sustaining practices</i>, this category comprises different goods, actions, criteria that are not directly practices in a narrow sense, particularly in combination with terms like “support”, “bonus” or similar, e.g., “scrapping bonus for pigsties”, “financial incentive for rural area”; the category does only include ideas that were not already coded in other categories for support like <i>support for grazing</i> and that were not already coded in a category within the code (<i>agricultural</i>) <i>policy</i>, to avoid unnecessary doubling</p> |
| <p>support for small-scaled structures/fields</p> | <p>All answers related to the support for small fields and small-scaled structures, including terms like “small areas”, “small fields”, “small structures”, etc., combined with the term “support” or related terms; all answers that were coded as <i>small-scaled</i></p>                                                                                                                                                                                                                                                                                                                                                                                                  |

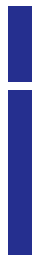

support for future-oriented agricultural practices/crops

*structures/fields* and similar ideas that additionally included terms related to “(monetary) support” are in this category

All answers related to the support for future-oriented agricultural practices/crops, including terms like “climate-resilient seeds”, “new technologies”, etc., combined with the term “support” or related terms; all answers that were coded as *future-oriented agricultural practices/crops* and similar ideas that additionally included terms like “(monetary) support” are in this category

Table D2. Thematic categorization system with frequencies of coded segments. Indent indicates the respective level in the code system. For nature managers, crossed out categories did not exist in the categorization system as absolute numbers of suggestions were too low for further division.

| Codes                                                 | farmer cluster | farmer cluster | nature   |
|-------------------------------------------------------|----------------|----------------|----------|
|                                                       | f1             | f2             | managers |
| agriculture & landscape                               | 521            | 355            | 101      |
| landscape structure                                   | 137            | 111            | 23       |
| field margins                                         | 16             | 9              | 5        |
| buzzwords field margins                               | 7              | 0              | -        |
| comments/suggestions for field margins                | 6              | 6              | -        |
| establishment of field margins                        | 3              | 3              | -        |
| hedges                                                | 24             | 23             | 5        |
| buzzwords hedges                                      | 4              | 4              | -        |
| comments/suggestions for hedges                       | 10             | 7              | -        |
| establishment of hedges                               | 10             | 12             | -        |
| biotopes/structural elements                          | 20             | 37             | 7        |
| buzzwords biotopes/structural elements                | 3              | 10             | -        |
| comments/suggestions for biotopes/structural elements | 11             | 11             | -        |
| establishment of biotopes/structural elements         | 6              | 16             | -        |
| biotope networks                                      | 4              | 3              | 3        |
| landscape conservation                                | 6              | 6              | 4        |
| small-scaled structures/fields                        | 9              | 11             | 2        |
| wildflower areas                                      | 64             | 26             | 2        |
| buzzwords wildflower areas                            | 28             | 11             | -        |
| comments/suggestions for wildflower areas             | 33             | 11             | -        |
| establishment of wildflower areas                     | 3              | 4              | -        |
| animal husbandry                                      | 30             | 20             | 12       |
| extensive animal husbandry                            | 0              | 1              | 0        |
| animal feed                                           | 3              | 2              | 1        |

|                                                 |     |     |    |
|-------------------------------------------------|-----|-----|----|
| animal welfare                                  | 0   | 1   | 2  |
| linkage production-livestock area               | 4   | 1   | 1  |
| support for grazing                             | 5   | 4   | 6  |
| grazing                                         | 15  | 6   | 3  |
| other suggestions for animal husbandry          | 4   | 7   | 0  |
| grassland                                       | 77  | 49  | 21 |
| flower meadows                                  | 9   | 4   | 1  |
| demand/support for grassland                    | 8   | 7   | 5  |
| extensive grassland                             | 12  | 6   | 0  |
| biodiverse meadows/pastures                     | 6   | 3   | 2  |
| cutting frequency                               | 6   | 8   | 2  |
| cutting date                                    | 20  | 12  | 8  |
| animal-/insect-friendly mowing                  | 6   | 3   | 3  |
| other suggestions for grassland                 | 5   | 5   | 3  |
| design of mowing practices                      | 13  | 6   | 0  |
| arable land                                     | 246 | 139 | 26 |
| cultivation of mixed crops/perennials           | 7   | 6   | 1  |
| holistic/innovative agricultural systems        | 5   | 10  | 1  |
| reduction of monocultures/corn cultivation      | 5   | 6   | 1  |
| undersown crops                                 | 5   | 1   | 1  |
| orchards                                        | 11  | 18  | 0  |
| fallow of arable land                           | 21  | 11  | 5  |
| crop rotation                                   | 40  | 12  | 1  |
| buzzwords crop rotation                         | 14  | 5   | -  |
| comments/suggestions for crop rotation          | 26  | 7   | -  |
| soil protective measures (no-till/reduced till) | 10  | 1   | 1  |
| catch crops                                     | 36  | 9   | 1  |

|  |                                              |    |    |    |
|--|----------------------------------------------|----|----|----|
|  | buzzwords catch crops                        | 12 | 1  | -  |
|  | comments/suggestions for catch crops         | 24 | 8  | -  |
|  | humus/soil fertility                         | 15 | 9  | 2  |
|  | buzzwords humus formation                    | 5  | 5  | -  |
|  | comments/suggestion for humus/soil fertility | 10 | 4  | -  |
|  | fertilizers                                  | 34 | 30 | 7  |
|  | other comments/suggestions for fertilizers   | 3  | 4  | -  |
|  | methods for fertilizer reduction             | 20 | 15 | -  |
|  | ban/abandonment manure only                  | 1  | 4  | -  |
|  | ban/abandonment fertilizer                   | 14 | 10 | -  |
|  | pesticides                                   | 26 | 19 | 4  |
|  | other comments/suggestions for pesticides    | 4  | 3  | -  |
|  | methods for pesticide reduction              | 18 | 11 | -  |
|  | ban/abandonment pesticides                   | 5  | 8  | -  |
|  | future-oriented agricultural practices/crops | 13 | 8  | 1  |
|  | legumes/protein crops                        | 9  | 4  | 0  |
|  | sowing practices                             | 14 | 2  | 0  |
|  | conversion cropland - grassland (both ways)  | 8  | 5  | 0  |
|  | status of agricultural fields                | 1  | 1  | 0  |
|  | ideas for different crops                    | 9  | 7  | 0  |
|  | environment                                  | 99 | 85 | 45 |
|  | soil protection                              | 19 | 14 | 0  |
|  | land consolidation                           | 0  | 0  | -  |
|  | soil protection in general                   | 9  | 9  | -  |
|  | erosion protection                           | 10 | 6  | -  |
|  | CO2 & climate                                | 14 | 7  | 4  |
|  | management regarding water resources         | 3  | 0  | -  |

|  |                                                   |     |     |     |
|--|---------------------------------------------------|-----|-----|-----|
|  | climate protection/adaptation                     | 5   | 5   | -   |
|  | CO2 sequestration                                 | 6   | 2   | -   |
|  | water protection                                  | 22  | 22  | 3   |
|  | riparian strips                                   | 12  | 3   | -   |
|  | buzzwords water protection                        | 2   | 8   | -   |
|  | comments/suggestions for water protection         | 8   | 11  | -   |
|  | biodiversity                                      | 19  | 16  | 13  |
|  | buzzwords biodiversity                            | 7   | 4   | -   |
|  | comments/suggestions for biodiversity             | 12  | 12  | -   |
|  | environmental/nature/species protection           | 33  | 37  | 29  |
|  | bees                                              | 3   | 2   | 0   |
|  | other (forest) animals                            | 8   | 11  | 1   |
|  | hamsters                                          | 0   | 1   | 0   |
|  | birds                                             | 9   | 9   | 6   |
|  | insects                                           | 5   | 6   | 1   |
|  | general (environmental/nature/species protection) | 14  | 15  | 23  |
|  | ecosystem                                         | 4   | 1   |     |
|  | research, consulting & education                  | 9   | 18  | 10  |
|  | (environmental) education of society              | 0   | 0   | 0   |
|  | society                                           | 0   | 0   | -   |
|  | children                                          | 0   | 0   | -   |
|  | education/training for farmers                    | 1   | 7   | 1   |
|  | advisory/support services                         | 8   | 10  | 9   |
|  | general                                           | 2   | 6   | -   |
|  | for individual farms                              | 6   | 4   | -   |
|  | research/alternative methods                      | 0   | 1   | 0   |
|  | policies & design                                 | 314 | 209 | 111 |

|                                                    |     |     |    |
|----------------------------------------------------|-----|-----|----|
| importance of regionality                          | 1   | 0   | 7  |
| public/municipal authorities/politics              | 4   | 2   | 0  |
| reduction in bureaucratic/administrative efforts   | 14  | 14  | 6  |
| flexibility/practicability/regionality of programs | 44  | 8   | 11 |
| demand for stricter regulations                    | 1   | 4   | 3  |
| desire for autonomy/exchange                       | 14  | 1   | 1  |
| criticism of existing regulations                  | 8   | 4   | 0  |
| future orientation of the agricultural policy      | 0   | 0   | 0  |
| price policy of agricultural products              | 1   | 0   | 0  |
| (regional) marketing of agricultural products      | 2   | 0   | 0  |
| organic farming as solution                        | 9   | 18  | 2  |
| extensification as solution                        | 14  | 5   | 5  |
| biogas production                                  | 1   | 0   | 0  |
| reinforcement of individuality                     | 4   | 4   | 1  |
| planning/legal certainty                           | 5   | 7   | 2  |
| financial support & support programs               | 226 | 161 | 84 |
| design of AES                                      | 41  | 29  | 11 |
| time frame                                         | 2   | 3   | -  |
| area setting                                       | 4   | 6   | -  |
| area dependent regulations                         | 15  | 12  | -  |
| future-oriented design of AES                      | 20  | 10  | -  |
| Cultural Landscape Program (KULAP)                 | 39  | 21  | 1  |
| Nature Conservation Program (VNP)                  | 14  | 14  | 11 |
| Greening                                           | 2   | 0   | 0  |
| support for organic farming                        | 11  | 11  | 8  |
| combination possibilities between programs         | 12  | 11  | 2  |
| (higher) support dependent on farm size            | 3   | 3   | 2  |

|                                                          |    |    |    |
|----------------------------------------------------------|----|----|----|
| result-based (support) systems                           | 5  | 9  | 15 |
| demand for higher financial support                      | 29 | 18 | 10 |
| support for nature sustaining practices                  | 71 | 44 | 20 |
| support for different aspects                            | 9  | 9  | 8  |
| support for small-scaled structures/fields               | 4  | 6  | 2  |
| support for future-oriented agricultural practices/crops | 2  | 5  | 2  |



## E. Exemplary coding of two suggestions

Example 1, “higher support for the cultivation of catch crops, instead of glyphosate application”, was coded as follows:

Table E1. Exemplary coding for the suggestion of example 1.

| Codes |                                                             |
|-------|-------------------------------------------------------------|
| ■     | all usable suggestions                                      |
| ■     | suggested adaptations for existing AES (and administration) |
| ■     | Kulturlandschaftsprogramm                                   |
| ■     | soil & water protection                                     |
| ■     | agriculture & landscape                                     |
| ■     | arable land                                                 |
| ■     | catch crops                                                 |
| ■     | comments/suggestions for catch crops                        |
| ■     | pesticides                                                  |
| ■     | methods for pesticide reduction                             |
| ■     | (agricultural) policy                                       |
| ■     | financial support & support programs                        |
| ■     | demand for higher financial support                         |

Example 2, “support wildflower areas or similar on approx. 20% of the farm area, so that it can be integrated into the farm business as element of the crop rotation and design the remuneration in such a way that one is financially better off than if one cultivates corn or similar”, was coded as follows:

Table E2. Exemplary coding for the suggestion of example 2.

| Codes |                                                             |
|-------|-------------------------------------------------------------|
| ■     | all usable suggestions                                      |
| ■     | suggested adaptations for existing AES (and administration) |
| ■     | Kulturlandschaftsprogramm                                   |
| ■     | biodiversity                                                |
| ■     | agriculture & landscape                                     |
| ■     | landscape structure                                         |
| ■     | wildflower areas                                            |
| ■     | comments/suggestions for wildflower areas                   |
| ■     | arable land                                                 |
| ■     | reduction of monocultures/corn cultivation                  |
| ■     | crop rotation                                               |
| ■     | comments/suggestions for crop rotation                      |
| ■     | (agricultural) policy                                       |
| ■     | financial support & support programs                        |
| ■     | support for nature sustaining practices                     |

## F. Specific farmer suggestions and comparison

### *Specific new suggestions per cluster:*

Examples for aspects only mentioned in f1 were the cultivation of corn only once in five years, and the inclusion of 30% permanent grassland into the crop rotation. Another idea was to improve payments for grassland for a better compensation compared to cropland, with a payment of 500 € for a maximum of three cuts. One respondent suggested to establish new agricultural branches like “landscape conservation” with mostly extensive cultivation. Further proposals included the cultivation of various crops (water efficient, disease resistant) and bonuses , for suckler cow husbandry, or for wild birds breeding on the farm. In cluster f2, ideas were (the support for) perennial crops, permaculture, agriphotovoltaics, as well as the inclusion of weather adapted crops. Moreover, a bonus for animal husbandry without manure and the for set-aside of agricultural land for very long periods, like 15 years, were mentioned. Two very specific suggestions were a “three-part KULAP for catch crops: Stage 1: after the harvest of the grains, grass-clover mix is mown in autumn and fed and directly turned over (umbrechen): bonus 75 €/ha. [Stage 2:] clover is mown and fed in autumn. Afterwards turn over and subsequent crop: 150 €/ha. Stage 3: winter soil cover without the use as fodder as usual: 300 €/ha” as well as a “subsidy for the following type of grassland management: No artificial fertilizer (especially nitrogen) only dung and liquid manure on the meadow of the own cows. Maximum number of animals per hectare area (lease and ownership) No calf rearing with anything else other than the milk from the mother cow and green fodder from the own land. No use of protein crops/feed (soy from South America), not tethering; open stable and grazing.”.

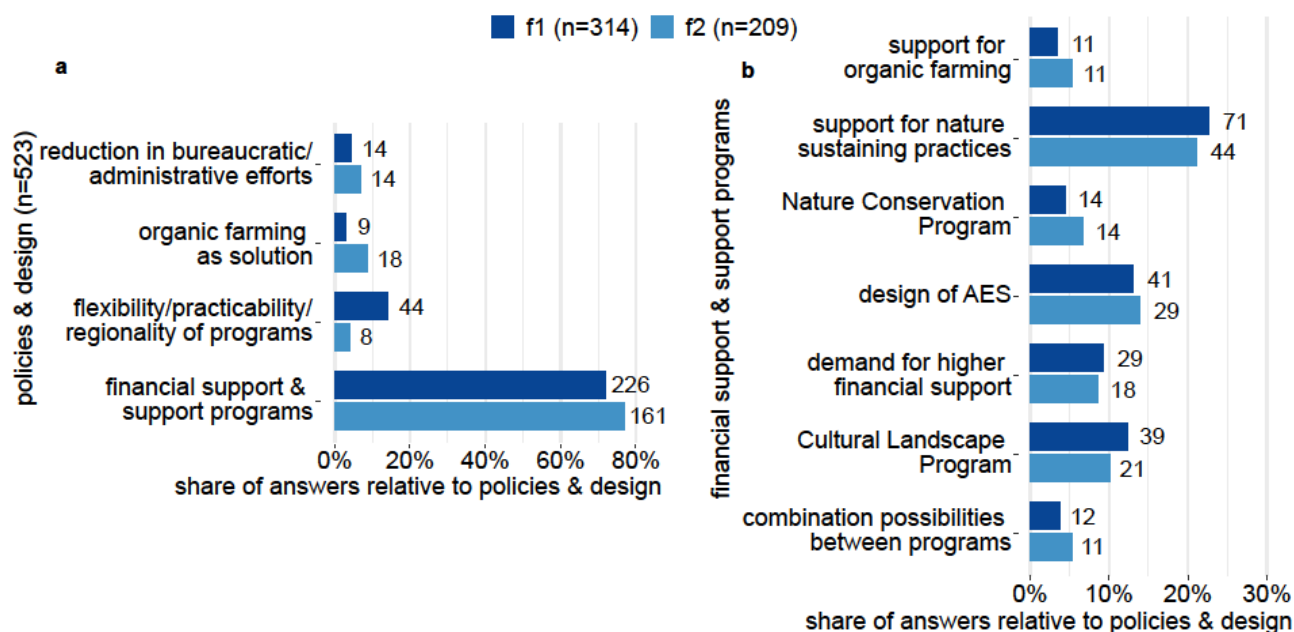

Fig. F1. Relative share of the most dominant codes within (a) policies & design and (b) financial support & support programs as a subcode of policies & design for the group of farmers per cluster. Numbers behind the bars indicate absolute numbers (counts) of coded segments. Codes are displayed if the respective code a share of at least 5% in at least one cluster, relative to the counts for policies & design.

### Adaptations:

Table F1. Detailed description of selected farmer suggestions

|                                                                     | Existing measures                                                                   | Adaptations                                                                   | Cluster |
|---------------------------------------------------------------------|-------------------------------------------------------------------------------------|-------------------------------------------------------------------------------|---------|
| KULAP                                                               | Climate protection                                                                  |                                                                               |         |
|                                                                     | B19, B20, (B21) (extensive grassland use; gazing stock eating roughage)             | - More varieties and intensities for LSU                                      | f1      |
|                                                                     |                                                                                     | - B20: only consider LSU that really need roughage                            | f1      |
|                                                                     | B25/B26 (low emission distribution of organic fertilizers)                          | - Extend fertilizer application close to ground                               | f1      |
|                                                                     | B28/B29* (conversion crop-grassland along water bodies)                             | - Allow conversion into grassland in all areas                                | both    |
|                                                                     |                                                                                     | - Remove limit of 5 ha; e.g., allow on 0,1 % of the cropland in upper Bavaria | f2      |
|                                                                     | Soil & water protection                                                             |                                                                               |         |
|                                                                     | B32/B33, B34* (riparian and erosion protection strips)                              | - Compensation according to soil quality                                      | f1      |
|                                                                     |                                                                                     | - Active support for wide riparian strips (>10m)                              | f1      |
|                                                                     | B35* (winter soil cover with catch crops)                                           | - Re-establish/support measure for catch crops/undersown crops                | both    |
| - Extend catch crop cultivation                                     |                                                                                     | f1                                                                            |         |
| - Without fixed date for soil cultivation                           |                                                                                     | f1                                                                            |         |
| - Support for the cultivation of catch crops without specific crops |                                                                                     | f1                                                                            |         |
| B37 (mulch seeding)                                                 | - Enable support for catch crops for small farms without greening                   | f1                                                                            |         |
|                                                                     | - Re-establish/support mulch seeding                                                | both                                                                          |         |
|                                                                     | - Improved practicability, e.g., if mulch cover can't be established due to dryness | f1                                                                            |         |
| Biodiversity                                                        |                                                                                     |                                                                               |         |
| B40 (preservation of biodiverse grasslands)                         | - Include cutting date                                                              | f1                                                                            |         |
|                                                                     | - Include alternating mowing practices (between hay and silage)                     | both                                                                          |         |

|                                                                       |                                                                                                                                 |                                                                                                                                   |                                                                                                                                                                                                       |      |
|-----------------------------------------------------------------------|---------------------------------------------------------------------------------------------------------------------------------|-----------------------------------------------------------------------------------------------------------------------------------|-------------------------------------------------------------------------------------------------------------------------------------------------------------------------------------------------------|------|
|                                                                       | B43-B46* (diverse crop rotation)                                                                                                | - Extend crop rotation (program)                                                                                                  | f1                                                                                                                                                                                                    |      |
|                                                                       |                                                                                                                                 | - Stop B43 because supports conventional rape cultivation                                                                         | f1                                                                                                                                                                                                    |      |
|                                                                       |                                                                                                                                 | - Include fallow in crop rotation (with remuneration)                                                                             | f1                                                                                                                                                                                                    |      |
|                                                                       |                                                                                                                                 | - (More support for) the cultivation of (domestic) legumes, alfalfa, clover; include alfalfa grass (f2); also for organic farms   | both                                                                                                                                                                                                  |      |
|                                                                       | B47 (yearly changing wildflower areas), B48/B61* (wildflower areas)                                                             |                                                                                                                                   | - Enable stepwise mulching for patches with old and new plants                                                                                                                                        | f1   |
|                                                                       |                                                                                                                                 |                                                                                                                                   | - Support interconnected wildflower strips                                                                                                                                                            | f1   |
|                                                                       |                                                                                                                                 |                                                                                                                                   | - Extend/remove area limitations; e.g., allow wildflower areas on 20% of farm area (enables option for inclusion into crop rotation), or on entire farm area, or for 20 ha of farm area               | both |
|                                                                       |                                                                                                                                 |                                                                                                                                   | - Implement sowing period late in the year/after harvest to establish a plant stock ( <i>Bestand</i> ) before winter, that stays until the harvest in the consecutive year; no turn over before April | f1   |
|                                                                       |                                                                                                                                 |                                                                                                                                   | - more flexibility, e.g., regarding deviations of only 20% (f4)                                                                                                                                       |      |
|                                                                       |                                                                                                                                 |                                                                                                                                   | - Support wild herbs instead of flowering strips                                                                                                                                                      | f1   |
| B49 (renewal of hedges/field shrubs) including investment measure     |                                                                                                                                 | - Individual seed mixtures                                                                                                        | f2                                                                                                                                                                                                    |      |
|                                                                       |                                                                                                                                 |                                                                                                                                   | f2                                                                                                                                                                                                    |      |
|                                                                       |                                                                                                                                 |                                                                                                                                   |                                                                                                                                                                                                       |      |
| Cultural landscape                                                    |                                                                                                                                 |                                                                                                                                   |                                                                                                                                                                                                       |      |
| B57* (orchards)                                                       | - Protection of fruit tress without size restrictions                                                                           |                                                                                                                                   | f2                                                                                                                                                                                                    |      |
| B59* (structural and landscape elements) including investment measure |                                                                                                                                 | - Higher remuneration for planting trees at field margins                                                                         | f1                                                                                                                                                                                                    |      |
|                                                                       |                                                                                                                                 | - Possibility to remove landscape elements (ahead of fixed timeframe)                                                             | f1                                                                                                                                                                                                    |      |
|                                                                       |                                                                                                                                 | - Inclusion of further landscape elements: stone houses, dead wood structures, clearance cairns, stone piles                      | both                                                                                                                                                                                                  |      |
|                                                                       |                                                                                                                                 | - More biodiverse and blooming hedges                                                                                             | f2                                                                                                                                                                                                    |      |
|                                                                       | - Allow more landscape elements per area                                                                                        |                                                                                                                                   | both                                                                                                                                                                                                  |      |
| Organic farming                                                       |                                                                                                                                 |                                                                                                                                   |                                                                                                                                                                                                       |      |
| B10* (organic farming)                                                | - Remove minimum LSU of 0.3; the main forage area should not be considered                                                      |                                                                                                                                   | f2                                                                                                                                                                                                    |      |
| Overlapping                                                           |                                                                                                                                 |                                                                                                                                   |                                                                                                                                                                                                       |      |
| Applicable to several measures                                        |                                                                                                                                 | - Attractive support for measures with very late mowing only every two years (good for ground-breeding birds and plant diversity) | f1                                                                                                                                                                                                    |      |
|                                                                       |                                                                                                                                 |                                                                                                                                   | f1                                                                                                                                                                                                    |      |
|                                                                       |                                                                                                                                 | - Reduced seed density (now only in VNP)                                                                                          | both                                                                                                                                                                                                  |      |
|                                                                       |                                                                                                                                 | - Set-aside for longer/temporary periods (mostly in VNP, in KULAP not subsidized)                                                 | f1                                                                                                                                                                                                    |      |
|                                                                       | - More possibilities for extensive grassland                                                                                    |                                                                                                                                   |                                                                                                                                                                                                       |      |
| VNP                                                                   | Biotope type arable fields/meadows                                                                                              |                                                                                                                                   |                                                                                                                                                                                                       |      |
|                                                                       | H12-H14 (fallow arable field), H29 (fallow meadow)                                                                              | - Adapt measures to avoid mulching every two years on fallow areas                                                                | f1                                                                                                                                                                                                    |      |
|                                                                       | Biotope type ponds                                                                                                              |                                                                                                                                   |                                                                                                                                                                                                       |      |
| H41-44                                                                | - Less support for ponds free of fish, and more for managed fishponds (kingfisher density increases with intensive KO-breeding) |                                                                                                                                   | f2                                                                                                                                                                                                    |      |

## G. Specific nature managers' suggestions

Table G1. Suggested adaptations by nature managers for the KULAP and the VNP. Codes and measures were extracted from the overview of measures of the KUALP and the VNP (version December 2020, (StMELF, 2020b)).

|                                                                      | Existing measures                                                                                                                                                                                | Adaptations                                                                                                                                          |
|----------------------------------------------------------------------|--------------------------------------------------------------------------------------------------------------------------------------------------------------------------------------------------|------------------------------------------------------------------------------------------------------------------------------------------------------|
| <b>KULAP</b>                                                         | Soil & water protection                                                                                                                                                                          |                                                                                                                                                      |
|                                                                      | B35 (winter soil cover with catch crops)                                                                                                                                                         | - Re-establish undersown crops (to support undersown crops in corn)                                                                                  |
|                                                                      | Biodiversity                                                                                                                                                                                     |                                                                                                                                                      |
|                                                                      | B49 (renewal of hedges/field shrubs) including investment measure                                                                                                                                | - More effort to protect hedges<br>- Inclusion of alleys                                                                                             |
|                                                                      | Cultural landscape                                                                                                                                                                               |                                                                                                                                                      |
| B59 (structural and landscape elements) including investment measure | - Inclusion of alleys                                                                                                                                                                            |                                                                                                                                                      |
| Overlapping                                                          |                                                                                                                                                                                                  |                                                                                                                                                      |
| Applicable to several measures                                       | - Include nature-preserving techniques, e.g., cutter bars (now only in VNP)<br>- Re-establish set-aside; set-aside of 7-10% of the farm area (now mostly in VNP, in KULAP mostly not subsidized) |                                                                                                                                                      |
| <b>VNP</b>                                                           | Biotope type pastures                                                                                                                                                                            |                                                                                                                                                      |
|                                                                      | H31-H33, F31-F33 (extensive grazing)                                                                                                                                                             | - Improved financial support, especially for alpine regions (see example: Switzerland)                                                               |
|                                                                      | Biotope type meadows                                                                                                                                                                             |                                                                                                                                                      |
|                                                                      | H21-H26, F22-F26 (extensive mowing) all meadow measures                                                                                                                                          | - Flexibility for cutting dates (yearly variations: dryness, precipitation, etc.)<br>- strong use of old grass strips in all meadow related measures |
| Additional services                                                  |                                                                                                                                                                                                  |                                                                                                                                                      |
| W08                                                                  | - improved support for double cutter bars                                                                                                                                                        |                                                                                                                                                      |

## H. Comparison between suggested measures and AES participation data

Table H1. The top five measures regarding the **area enrolled** and **number of applications** for the KULAP and the VNP for the year 2020. Changes in the position with respect to area enrolled/number of applications are shown for the years 2018 and 2019. For area, the dataset contains only area values for measures offered in 2015 (StMELF, 2014; Appendix A). For number of applications, all measures from the leaflet for 2021 are considered (StMELF, 2020b; Appendix A, C). Source: (European Commission, 2014a, 2014b) both provided by the StMELF.

| <b>Position<br/>2020/<br/>19/18</b> | <b>KULAP - Code &amp; measure description</b> |                                                                                       | <b>Position<br/>2020/<br/>19/18</b> | <b>VNP - Code &amp; measure description</b> |                                                                |
|-------------------------------------|-----------------------------------------------|---------------------------------------------------------------------------------------|-------------------------------------|---------------------------------------------|----------------------------------------------------------------|
| <b>Enrolled area</b>                |                                               |                                                                                       |                                     |                                             |                                                                |
| 1/1/1                               | B26/<br>B25                                   | Low emission distribution of organic fertilizers                                      | 1/1/1                               | N21                                         | Abandonment of any kind of fertilizers and chemical pesticides |
| 2/2/2                               | B10                                           | Organic farming                                                                       | 2/2/2                               | H22                                         | Extensive mowing; cutting date 15.06.                          |
| 3/4/3                               | B44                                           | Crop rotation with legumes                                                            | 3/3/3                               | W17                                         | Management stop until fixed cutting date                       |
| 4/3/5                               | B45                                           | Crop rotation with large grain legumes                                                | 4/4/4                               | H23                                         | Extensive mowing; cutting date 01.07.                          |
| 5/5/4                               | B20                                           | Extensive grassland use for gazing stock eating roughage, maximum 1.4 livestock units | 5/5/5                               | W15                                         | Additional bonus for wet/litter meadows                        |
| <b>Number of applications</b>       |                                               |                                                                                       |                                     |                                             |                                                                |
| 1/1/2                               | B26/<br>B25                                   | Low emission distribution of organic fertilizers                                      | 1/1/1                               | N21                                         | Abandonment of any kind of fertilizers and chemical pesticides |
| 2/3/3                               | B60                                           | Summer grazing (bonus)                                                                | 2/2/2                               | H22                                         | Extensive mowing; cutting date 15.06.                          |
| 3/2/1                               | B30                                           | Extensive grassland use along water bodies and in sensitive areas                     | 3/3/3                               | H23                                         | Extensive mowing; cutting date 01.07.                          |
| 4/4/5                               | B10                                           | Organic farming                                                                       | 4/4/4                               | W15                                         | Additional bonus for wet/litter meadows                        |
| 5/6/7                               | B48                                           | Wildflower areas at the forest edge and in the field                                  | 5/5/5                               | W17                                         | Management stop until fixed cutting date                       |

## I. Survey items and modified variables for the cluster analysis

Table I1. Variables with respective questions from the LandKlif survey used for the cluster analysis of the farmers. Table indicates where new variables were established based on questionnaire items or where items had to be transformed for the analysis.

| Variable name                                                                                                                                                                                                                                                                                                                                                                                 | Original question                                                                                                                                                                  | Response possibilities                                                                                                                                                                                                                                                                                               |
|-----------------------------------------------------------------------------------------------------------------------------------------------------------------------------------------------------------------------------------------------------------------------------------------------------------------------------------------------------------------------------------------------|------------------------------------------------------------------------------------------------------------------------------------------------------------------------------------|----------------------------------------------------------------------------------------------------------------------------------------------------------------------------------------------------------------------------------------------------------------------------------------------------------------------|
| act_spo,<br>act_wild,<br>act_ntfp,<br>act_mot,<br>act_fihu,<br>act_oth,<br>act_non,<br>count_sports                                                                                                                                                                                                                                                                                           | For which private activities do you use nature and landscapes in Bavaria? Please select (multiple answers possible)                                                                | <ul style="list-style-type: none"> <li>- walking, hiking, running, or biking</li> <li>- watching wildlife</li> <li>- collecting mushrooms, wild herbs, or berries</li> <li>- trips by motorcycle or car</li> <li>- fishing or hunting</li> <li>- other (please indicate)</li> <li>- no private activities</li> </ul> |
| <b>Modification:</b> For count_sports, all sport activities that were selected were summed up resulting in a maximum value of 6 and a minimum value of 0 (= no private activity).                                                                                                                                                                                                             |                                                                                                                                                                                    |                                                                                                                                                                                                                                                                                                                      |
| term_ES                                                                                                                                                                                                                                                                                                                                                                                       | Have you ever heard the term ecosystem services?                                                                                                                                   | yes<br>no                                                                                                                                                                                                                                                                                                            |
| LU_ES                                                                                                                                                                                                                                                                                                                                                                                         | For what should nature and landscape be used in Bavaria?<br>Please distribute points according to the importance. – Preserve services of nature and landscape for humans.          | scale from 0 to 100                                                                                                                                                                                                                                                                                                  |
| LU_bdiv                                                                                                                                                                                                                                                                                                                                                                                       | For what should nature and landscape be used in Bavaria?<br>Please distribute points according to the importance. – Support biodiversity of plants, animals, and mushrooms.        | scale from 0 to 100                                                                                                                                                                                                                                                                                                  |
| LU_inc                                                                                                                                                                                                                                                                                                                                                                                        | For what should nature and landscape be used in Bavaria?<br>Please distribute points according to the importance. – Gain financial income from forestry and agricultural products. | scale from 0 to 100                                                                                                                                                                                                                                                                                                  |
| relation                                                                                                                                                                                                                                                                                                                                                                                      | For a successful protection of nature and landscape, are especially important for Bavarian agricultural landscapes...<br>... personal relation of farmers to nature                | Likert scale with the possibilities: <ul style="list-style-type: none"> <li>- very unimportant</li> <li>- unimportant</li> <li>- neither</li> <li>- important</li> <li>- very important</li> <li>- I am not sure</li> </ul>                                                                                          |
| <b>Modification:</b> The binomial variable relation_unsure was derived from this question. For this, all respondents that indicated “I am not sure” received a “yes” while respondents that did not indicate anything received a “no”. The same procedure was applied for the variables laws_unsure (based on laws), submeas_unsure (based on submeas) and suboutc_unsure (based on suboutc). |                                                                                                                                                                                    |                                                                                                                                                                                                                                                                                                                      |
| laws                                                                                                                                                                                                                                                                                                                                                                                          | For a successful protection of nature and landscape, are especially important for Bavarian agricultural landscapes...<br>... stricter legal regulations                            | Likert scale with the possibilities: <ul style="list-style-type: none"> <li>- very unimportant</li> <li>- unimportant</li> <li>- neither</li> <li>- important</li> <li>- very important</li> <li>- I am not sure</li> </ul>                                                                                          |

|                                                                                                                                                             |                                                                                                                                                                |                                                                                                                                                                                                                                                                                                                                                                                                                                                             |
|-------------------------------------------------------------------------------------------------------------------------------------------------------------|----------------------------------------------------------------------------------------------------------------------------------------------------------------|-------------------------------------------------------------------------------------------------------------------------------------------------------------------------------------------------------------------------------------------------------------------------------------------------------------------------------------------------------------------------------------------------------------------------------------------------------------|
| submeas                                                                                                                                                     | For a successful protection of nature and landscape, are especially important for Bavarian agricultural landscapes...<br>... subsidies for prescribed measures | Likert scale with the possibilities:<br>- very unimportant<br>- unimportant<br>- neither<br>- important<br>- very important<br>- I am not sure                                                                                                                                                                                                                                                                                                              |
| suboutc                                                                                                                                                     | For a successful protection of nature and landscape, are especially important for Bavarian agricultural landscapes...<br>...subsidies based on success         | Likert scale with the possibilities:<br>- very unimportant<br>- unimportant<br>- neither<br>- important<br>- very important<br>- I am not sure                                                                                                                                                                                                                                                                                                              |
| particip_AES                                                                                                                                                | Are you participating in agri-environmental schemes at the moment (KULAP, VNP, LNPR)?                                                                          | yes<br>no                                                                                                                                                                                                                                                                                                                                                                                                                                                   |
| climcha_crop,<br>climcha_grass                                                                                                                              | Do you already notice any changes as a result of climate change on your own cultivated areas?                                                                  | - yes, on cropland<br>- yes, in grassland<br>- no                                                                                                                                                                                                                                                                                                                                                                                                           |
| <b>Modification:</b> Question was split into two variables, one for grassland and one for cropland, with each having “yes” or “no” as response possibility. |                                                                                                                                                                |                                                                                                                                                                                                                                                                                                                                                                                                                                                             |
| occ_status                                                                                                                                                  | Which connection do you have to farming?                                                                                                                       | - owner of a farm business<br>- family member or employee working in the farm business<br>- other                                                                                                                                                                                                                                                                                                                                                           |
| operation_mode                                                                                                                                              | Farming is for you?                                                                                                                                            | - full-time<br>- part-time                                                                                                                                                                                                                                                                                                                                                                                                                                  |
| farm_sys                                                                                                                                                    | What type of farming do you do?                                                                                                                                | - conventional<br>- organic                                                                                                                                                                                                                                                                                                                                                                                                                                 |
| area_crop,<br>area_grass,<br>area_forest                                                                                                                    | What is the size of your cultivated area (rounded up, in hectare)                                                                                              | Blank boxes to write down number for the following possibilities:<br>Survey 1:<br>- cropland<br>- permanent grassland<br>- other agricultural area (e.g., viticulture, fruit production ( <i>Obstbau</i> ))<br>- forest<br>- sum (of all)<br><br>Survey 2:<br>- cropland<br>- extensive permanent grassland – cut (incl. partly grazing)<br>- extensive permanent grassland – grazing only<br>- intensive permanent grassland<br>- forest<br>- sum (of all) |



**Modification:** This question had different answer possibilities as survey 2 gathered additional information for another research project.

For homogenization, the variables were constructed as follows:

area\_crop: the area of cropland (equal in both survey)

area\_grass: for survey 1, the area of permanent grassland was taken; for survey 2 the sum of all three grassland options was taken

area\_forest: the area of forest (equal in both surveys)

|             |                                                                                                                                                                    |                                                                                                                                                                                                                                                                                                                                                                                                                                                                                                                                                                                |
|-------------|--------------------------------------------------------------------------------------------------------------------------------------------------------------------|--------------------------------------------------------------------------------------------------------------------------------------------------------------------------------------------------------------------------------------------------------------------------------------------------------------------------------------------------------------------------------------------------------------------------------------------------------------------------------------------------------------------------------------------------------------------------------|
| anim_onsite | Do you have animals in the following animal groups (including young animals ( <i>Jungtiere</i> ))? Please, to the extent known, indicate in livestock units (LSU). | <p>Blank boxes to write down number for the following possibilities:<br/>Livestock units (if known):</p> <ul style="list-style-type: none"> <li>- cattle</li> <li>- ...of those dairy cattle</li> <li>- pigs</li> <li>- poultry</li> <li>- sheep</li> <li>- goats</li> <li>- horses, donkey, mule (<i>Maultier</i>)</li> </ul> <p>Number of animals (if LSU not known)</p> <ul style="list-style-type: none"> <li>- cattle</li> <li>- ...of those dairy cattle</li> <li>- pigs</li> <li>- poultry</li> <li>- sheep</li> <li>- goats</li> <li>- horses, donkey, mule</li> </ul> |
|-------------|--------------------------------------------------------------------------------------------------------------------------------------------------------------------|--------------------------------------------------------------------------------------------------------------------------------------------------------------------------------------------------------------------------------------------------------------------------------------------------------------------------------------------------------------------------------------------------------------------------------------------------------------------------------------------------------------------------------------------------------------------------------|

**Modification:** This question was transformed into a binomial variable indicating whether at least one animal is present on the farm. Every respondent that wrote down a value >0 in at least one of the 14 boxes related to the 14 animal categories received a “yes”, the rest received a “no”.

|      |                                     |                                                                                |
|------|-------------------------------------|--------------------------------------------------------------------------------|
| age* | What age category do you belong to? | <18, 18-25, 26-30, 31-35, 36-40, 41-45, 46-50, 51-55, 56-60, 61-65, 65-70, >70 |
|------|-------------------------------------|--------------------------------------------------------------------------------|

**Modification:** Age categories were summarized and transformed into an ordinal variable with three classes:

young: <18, 18-25, 26-30, 31-35

middle: 36-40, 41-45, 46-50, 51-55

old: 56-60, 61-65, 65-70, >70

|      |                      |                                                                                                                   |
|------|----------------------|-------------------------------------------------------------------------------------------------------------------|
| sex* | What is your gender? | <ul style="list-style-type: none"> <li>- female</li> <li>- male</li> <li>- divers</li> <li>- no answer</li> </ul> |
|------|----------------------|-------------------------------------------------------------------------------------------------------------------|

**Modification:** No answer was considered as missing value.

---

|      |                                                                                  |                                                                                                                                                                                                                                                           |
|------|----------------------------------------------------------------------------------|-----------------------------------------------------------------------------------------------------------------------------------------------------------------------------------------------------------------------------------------------------------|
| educ | What general school education do you have? Please indicate only the highest one. | <ul style="list-style-type: none"> <li>- lower secondary school</li> <li>- middle secondary school</li> <li>- higher secondary school</li> <li>- polytechnic secondary school</li> <li>- without general education degree</li> <li>- no answer</li> </ul> |
|------|----------------------------------------------------------------------------------|-----------------------------------------------------------------------------------------------------------------------------------------------------------------------------------------------------------------------------------------------------------|

**Modification:** Polytechnical secondary school (only selected four times in the entire sample) was classified as middle secondary school (both finish in 10<sup>th</sup> grade). For variables in cluster analysis naming changed:

lower secondary school (*Haupt-(Volks-)Schulabschluss*) → basic\_school

middle secondary school (*Realschul- oder gleichwertiger Abschluss*) + Polytechnic secondary school (*polytechnischen Oberschule*) → medium\_school

higher secondary school (*Fachhochschul- oder Hochschulreife*) → high\_school

without general education degree → no\_school

No answer was considered as missing value.

This variable was defined as ordinal with the order: no\_school < basic\_school < medium\_school < high\_school

---

|       |                                                          |                                                                                                                                                                                                                                                            |
|-------|----------------------------------------------------------|------------------------------------------------------------------------------------------------------------------------------------------------------------------------------------------------------------------------------------------------------------|
| quali | My professional training is (multiple answers possible): | <ul style="list-style-type: none"> <li>- no agricultural training</li> <li>- professional school</li> <li>- apprenticeship</li> <li>- agricultural school</li> <li>- master diploma</li> <li>- academy</li> <li>- college</li> <li>- university</li> </ul> |
|-------|----------------------------------------------------------|------------------------------------------------------------------------------------------------------------------------------------------------------------------------------------------------------------------------------------------------------------|

**Modification:** Qualifications were summarized and transformed into an ordinal variable with four classes (based on the German qualification framework (*deutscher Qualifikationsrahmen*):

non: no agricultural training

basic: professional school (*Berufsschule/Berufsfachschule (ohne betriebliche Lehre)*), apprenticeship (*Berufsausbildung/Lehre (Gehilfen-, Facharbeiter- oder andere Abschlussprüfung)*)

intermediate: agricultural school (*Landwirtschaftsschule (auch Weinbau-, Gartenbau-, Winterschule)*), master diploma (*Meister, Fachagrarwirt*), academy (*Höhere Landbauschule, Technikerschule, Fachakademie*), college (*Fachhoch-, Ingenieurschule*)

advanced: university (*Universität, Hochschule*)

---

|              |                                                                                                                                                                                                                                                                                                                             |                                                                                                                                                                             |
|--------------|-----------------------------------------------------------------------------------------------------------------------------------------------------------------------------------------------------------------------------------------------------------------------------------------------------------------------------|-----------------------------------------------------------------------------------------------------------------------------------------------------------------------------|
| climcha_atti | How do you feel about the following statements? Select.<br>Climate change in general...<br>- ...is scientifically verifiable (1)<br>- ...has predominantly natural causes (2)<br>- ...has already global impacts today (3)<br>- ...will only become relevant for future generations (4)<br>- ...can still be influenced (5) | <ul style="list-style-type: none"> <li>- no, for sure not</li> <li>- no, probably not</li> <li>- I am not sure</li> <li>- yes, probably</li> <li>- yes, for sure</li> </ul> |
|--------------|-----------------------------------------------------------------------------------------------------------------------------------------------------------------------------------------------------------------------------------------------------------------------------------------------------------------------------|-----------------------------------------------------------------------------------------------------------------------------------------------------------------------------|

**Modifications:** The questions were summarized and transformed into a variable representing the attitude towards climate change. Each respondent was shown a random selection of three questions out of five. The question whether climate change can still be influenced, was not considered since this depends strongly on a very personal view and can scientifically neither be rejected nor accepted.

For the other four questions a scheme was developed, and the following values were attributed to each respondent:

belief: respondents that answered with “yes, ...” to question 1, 3 and with “no, ...” to question 2, 4

insecure belief: respondents that answered with “yes, ...” or “I am not sure” to question 1, 3 and with “no, ...” or “I am not sure” to question 2, 4

insecure: respondents that answered all questions with “I am not sure”

insecure rejection: respondents that answered with “no, ...” or “I am not sure” to question 1, 3 and with “yes, ...” or “I am not sure” to question 2, 4

rejection: respondents that answered with “no, ...” to question 1, 3 and with “yes, ...” to question 2, 4

indifferent: respondents that had different combinations where no trend was observed

Indifferent and insecure were in the end treated as one class, namely insecure.

---

J. Additional information for the farmers' cluster analysis

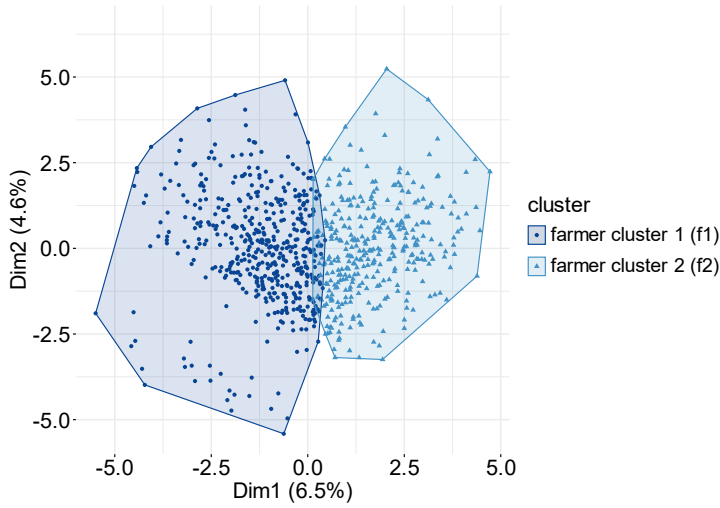

Fig. J1. Farmer clusters as a result of the hierarchical clustering and the NbClust function.

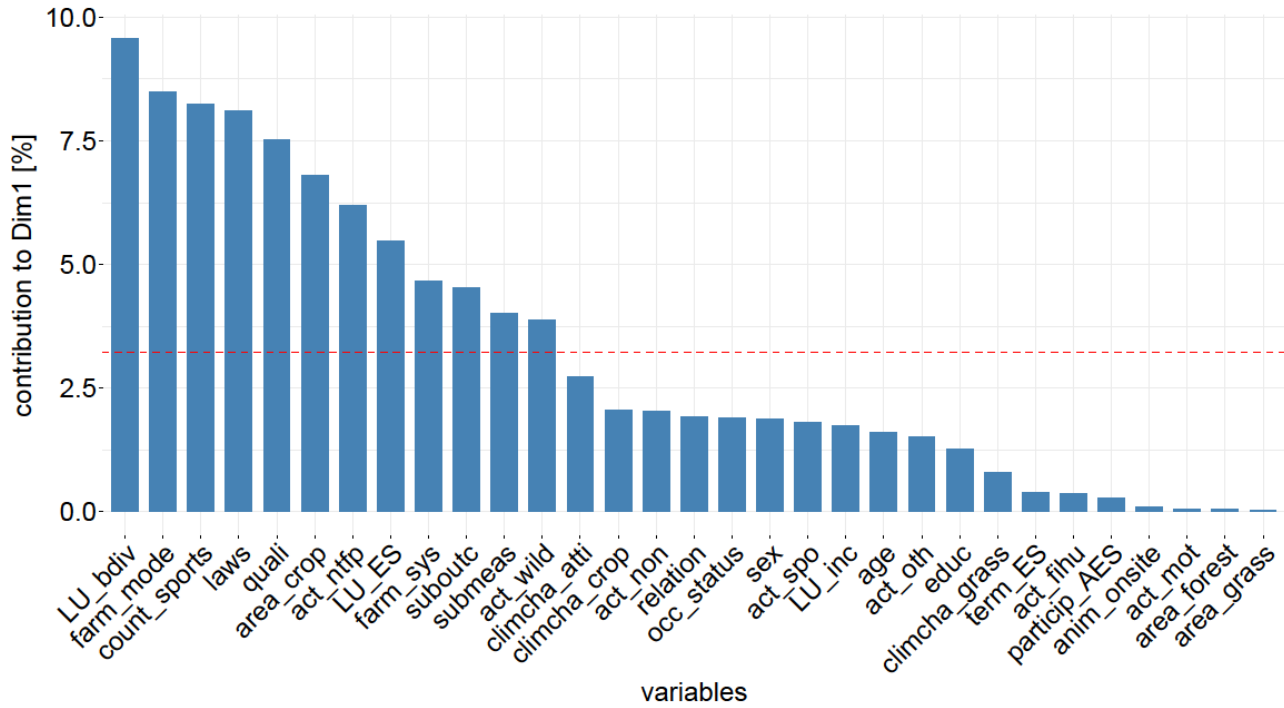

Fig. J2. Contribution of each variable to dimension one. Values represent with how many percent one variable contributes to the construction of dimension one. If a variable has a high contribution, it means that the respective dimension explains a lot of the variance in the data with respect to this variable.

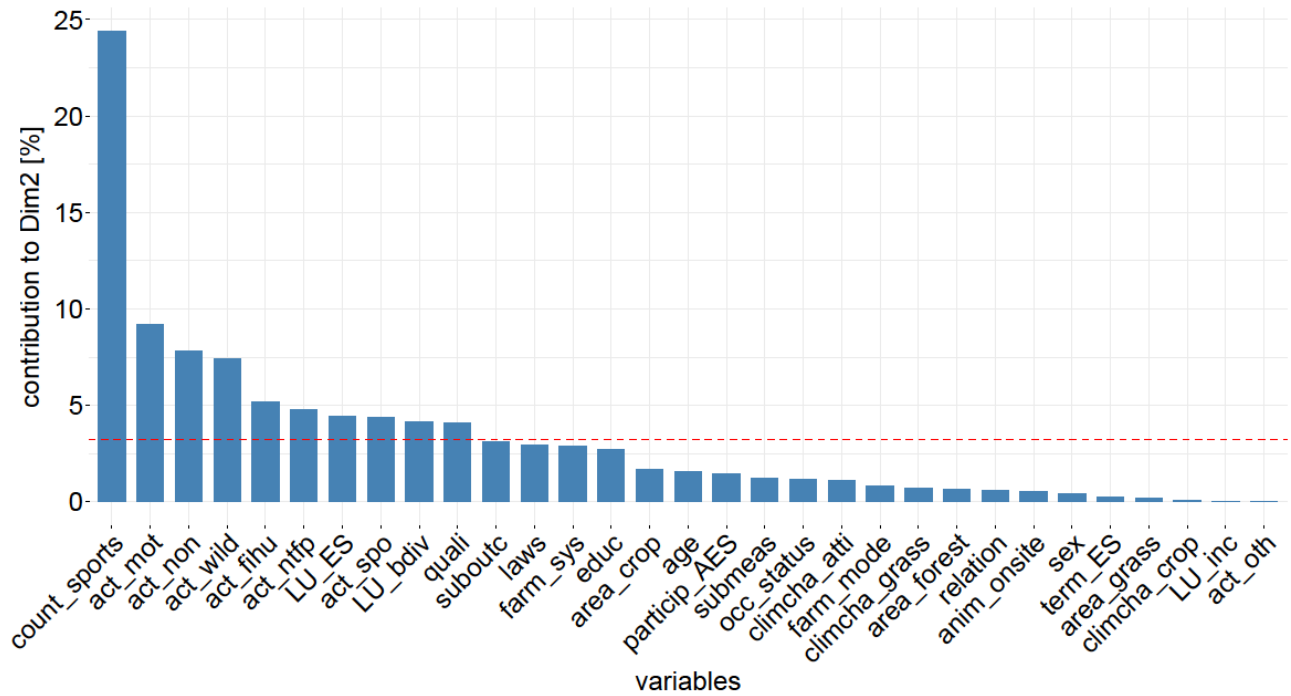

Fig. J3. Contribution of each variable to dimension two (farmers). Values represent with how many percent one variable contributes to the construction of dimension two. If a variable has a high contribution, it means that the respective dimension explains a lot of the variance in the data with respect to this variable.

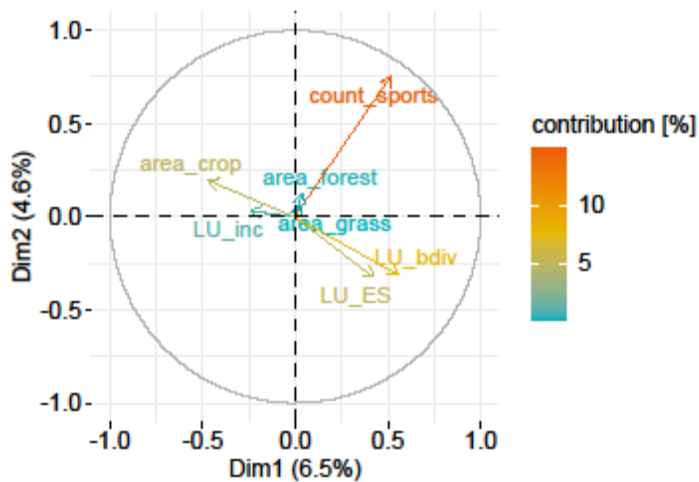

Fig. J4. Contribution (strength and direction) of the quantitative variables to the first two dimensions. Dark orange colors have a high contribution to the dimensions. For variable names, see SI, Table I1.

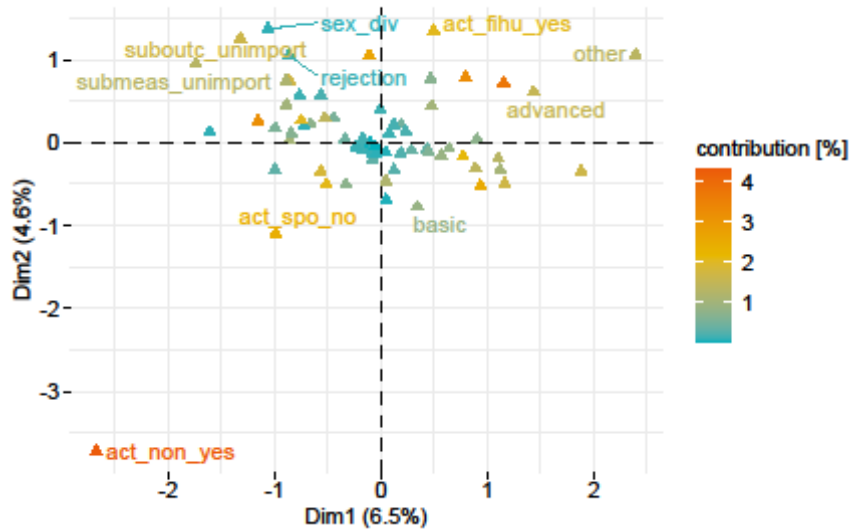

Fig. J5. Contribution (strength and direction) of the qualitative variables to the first two dimensions. Dark orange colors have a high contribution to the dimensions. Axis values represent the correlation between the variable and the dimension. A stronger correlation implies a higher explanatory value with regard to the respective dimension. Variables around the center (0.0, 0.0) have a very low contribution and are not included with names in this Figure. Their contribution can be inferred from Fig. A4 and A5. For variable names, see SI, Table I1.

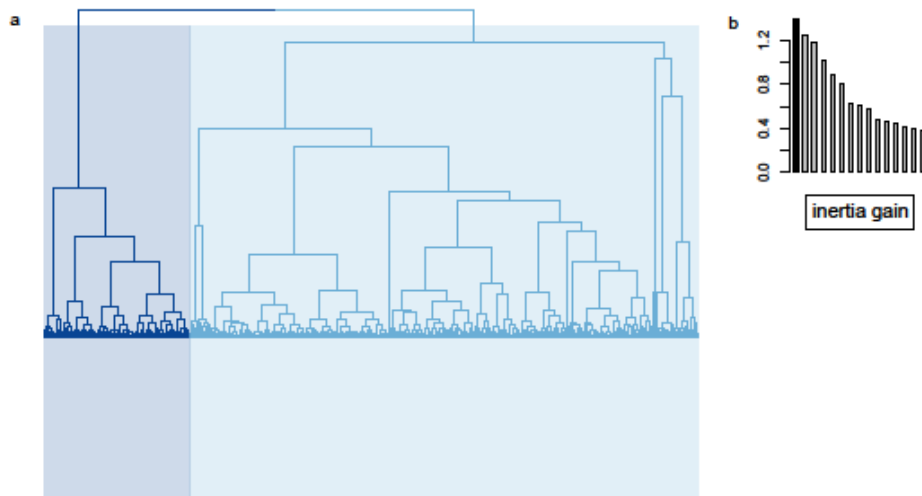

Fig. J6. (a) Dendrogram computed by the HCPC function. A total of 20 dimensions with an eigenvalue bigger than one were extracted with an explained variance of 58.31%. The hierarchical clustering yielded an optimal number of three clusters with multiple overlaps, and a possible division into two clusters, seen above. From the NbClust function most indices supported the finding of four clusters, followed by two clusters, as shown in the SI, Fig. J7. Based on this, the group of farmers were divided into two clusters (b) Bar plot with inertia gain computed by the HCPC function, showing the division into the two farmer clusters. The best partition is the one with higher relative loss in inertia (drop between neighbouring bars). The bar plot shows that the loss in inertia is also high between cluster two and three as well as three and four (bar one and two as well as two and three, respectively). However, cluster results with three or four clusters had many overlaps/very small cluster sizes and two clusters were well supported by the NbClust function (see SI, Fig J7).

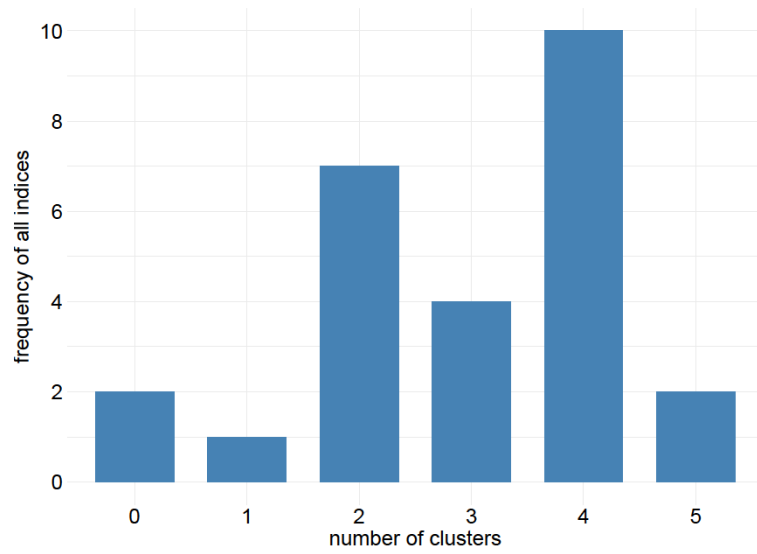

*Fig. J7. Optimal number of clusters according to the NbClust function. The number of clusters with the highest frequency of indices is seen as optimal. The minimum and maximum number of clusters was set to two and five, respectively. We decided to divide the farmers into two cluster as a division into four cluster resulted in many overlaps among the clusters and one of the four clusters contained only three participants.*

## K. Description of the cluster characteristics for the farmers

Table K1. The ten most influencing qualitative variables for each farmer cluster. The clusters are described on the basis of the statistical v-test (describing the deviation between the mean of a subpopulation and the general average (Husson et al., 2020)) and their equivalent p-values. A p-value of 0.05 equals a v-test smaller/greater than -1.96/1.96 (Husson et al., 2010). Positive v-test values indicate that the average of the variable in the cluster is larger than the average of the variable in the sample. This means that if a v-test is higher than 1.96, the mean value of a specific category in one cluster is significantly higher than the overall mean in the sample. Exemplary, cluster f1 shows a p-values of 5.02e-24 and a v-test value of 10.11 for the category farm\_sys = conventional. This indicates that there are significantly more farmers in f1, that work on a conventional farm (74.58% of farmers in f1), compared to the overall share of conventional farmers in the entire sample (60.00% of all farmers). Only the variables with ten most significant positive v-test values (significance was based on the v-test and the p-values) are listed and only the p-values are reported in the Table. SX. The design of the table was based on Beltrán-Alcrudo et al. (2018).

| Qualitative variable name | Variable outcome | % of sample in the cluster <sup>1</sup> | % of variable outcome in the cluster <sup>2</sup> | % of variable outcome in the sample <sup>3</sup> | p-value  |
|---------------------------|------------------|-----------------------------------------|---------------------------------------------------|--------------------------------------------------|----------|
| <b>Cluster f1</b>         |                  |                                         |                                                   |                                                  |          |
| operation_mode            | full-time        | 82.22                                   | 53.96                                             | 38.18                                            | 1.14e-29 |
| quali                     | intermediate     | 76.27                                   | 68.96                                             | 52.61                                            | 3.94e-29 |
| act_ntfp                  | no               | 71.24                                   | 80.00                                             | 65.33                                            | 1.50e-25 |
| farm_sys                  | conventional     | 72.32                                   | 74.58                                             | 60.00                                            | 5.20e-24 |
| act_wild                  | no               | 70.08                                   | 71.25                                             | 59.15                                            | 7.47e-17 |
| laws                      | unimport         | 79.70                                   | 32.70                                             | 23.88                                            | 5.14e-13 |
| laws                      | very unimportant | 78.26                                   | 26.25                                             | 19.52                                            | 3.38e-09 |
| relation                  | important        | 74.77                                   | 33.33                                             | 25.94                                            | 6.09e-09 |
| suboutc                   | neither          | 80.30                                   | 25.01                                             | 16.00                                            | 6.30e-09 |
| climcha_crop              | yes              | 65.80                                   | 68.13                                             | 60.24                                            | 5.33e-08 |
| <b>Cluster f2</b>         |                  |                                         |                                                   |                                                  |          |
| act_ntfp                  | yes              | 69.78                                   | 54.20                                             | 32.48                                            | 1.12e-29 |
| operation_mode            | part-time        | 57.02                                   | 76.52                                             | 56.12                                            | 2.53e-24 |
| act_wild                  | yes              | 61.44                                   | 56.81                                             | 38.67                                            | 1.15e-19 |
| farm_sys                  | organic          | 63.74                                   | 50.43                                             | 33.10                                            | 3.40e-19 |
| quali                     | advanced         | 79.27                                   | 18.84                                             | 9.94                                             | 4.16e-13 |
| laws                      | important        | 68.75                                   | 28.70                                             | 17.45                                            | 7.97e-13 |
| laws                      | very_important   | 83.87                                   | 15.07                                             | 7.52                                             | 2.05e-12 |
| quali                     | non              | 68.12                                   | 27.25                                             | 16.73                                            | 9.69e-12 |
| suboutc                   | very_important   | 61.01                                   | 38.55                                             | 26.42                                            | 2.91e-11 |
| submeas                   | very_important   | 54.78                                   | 56.52                                             | 43.15                                            | 5.12e-11 |

<sup>1</sup>. Percentage of sample in the cluster = % of individuals with the respective variable outcome in the entire sample, that belong to this cluster. For example, 72.32% of all conventional farmers in the sample belong to cluster f1.

<sup>2</sup>. Percentage of variable outcome in the cluster = % of individuals in the cluster with variable outcome. For example, 74.58% of the farmers in cluster f1 are conventional.

<sup>3</sup>. Percentage of variable outcome in the sample = % of the respective variable outcome in the entire sample. For example, 60.00% of farmers in the entire sample are conventional which means that the rest is either organic or gave no answer.



Table K2. Socio-demographic and farm characteristics per each farmer cluster. Numbers do not add up to 100% as missing values are not shown.

| Variable             | Variable outcome | Absolute numbers in the cluster |     | Percent values in the cluster [numbers in %] |    |
|----------------------|------------------|---------------------------------|-----|----------------------------------------------|----|
|                      |                  | f1                              | f2  | f1                                           | f2 |
| Farm system          | conventional     | 358                             | 252 | 75                                           | 44 |
|                      | organic          | 99                              | 234 | 21                                           | 41 |
| Operation mode       | full-time        | 259                             | 98  | 54                                           | 17 |
|                      | part-time        | 199                             | 398 | 41                                           | 70 |
| Participation in AES | yes              | 434                             | 461 | 90                                           | 81 |
|                      | no               | 45                              | 82  | 9                                            | 14 |
| Age                  | < 18             | 0                               | 0   | 0                                            | 0  |
|                      | 18-25            | 18                              | 2   | 4                                            | 1  |
|                      | 26-30            | 28                              | 10  | 6                                            | 3  |
|                      | 31-35            | 32                              | 14  | 7                                            | 4  |
|                      | 36-40            | 45                              | 25  | 10                                           | 8  |
|                      | 41-45            | 48                              | 32  | 11                                           | 10 |
|                      | 46-50            | 76                              | 48  | 17                                           | 15 |
|                      | 51-55            | 90                              | 59  | 20                                           | 18 |
|                      | 56-60            | 54                              | 62  | 12                                           | 19 |
|                      | 61-65            | 44                              | 48  | 10                                           | 15 |
|                      | 66-70            | 16                              | 14  | 4                                            | 4  |
| > 70                 | 5                | 8                               | 1   | 2                                            |    |
| Gender               | male             | 403                             | 364 | 84                                           | 64 |
|                      | female           | 29                              | 104 | 6                                            | 18 |
|                      | divers           | 3                               | 3   | 0                                            | 1  |
| Education            | no_school        | 0                               | 1   | 0                                            | 0  |
|                      | basic_school     | 149                             | 138 | 31                                           | 24 |
|                      | medium_school    | 173                             | 130 | 36                                           | 23 |
|                      | high_school      | 126                             | 218 | 26                                           | 38 |
| Qualification        | non              | 44                              | 140 | 1                                            | 25 |
|                      | basic            | 64                              | 96  | 13                                           | 17 |
|                      | intermediate     | 331                             | 169 | 69                                           | 30 |
|                      | advanced         | 17                              | 88  | 35                                           | 15 |
